# Supplementary material for: Activation of Young LINE-1 Elements by CRISPRa
Source: MDPI journal article supplement (doi:10.3390/ijms25010424), 2023-12-28
Supplement: s1 [file s1]

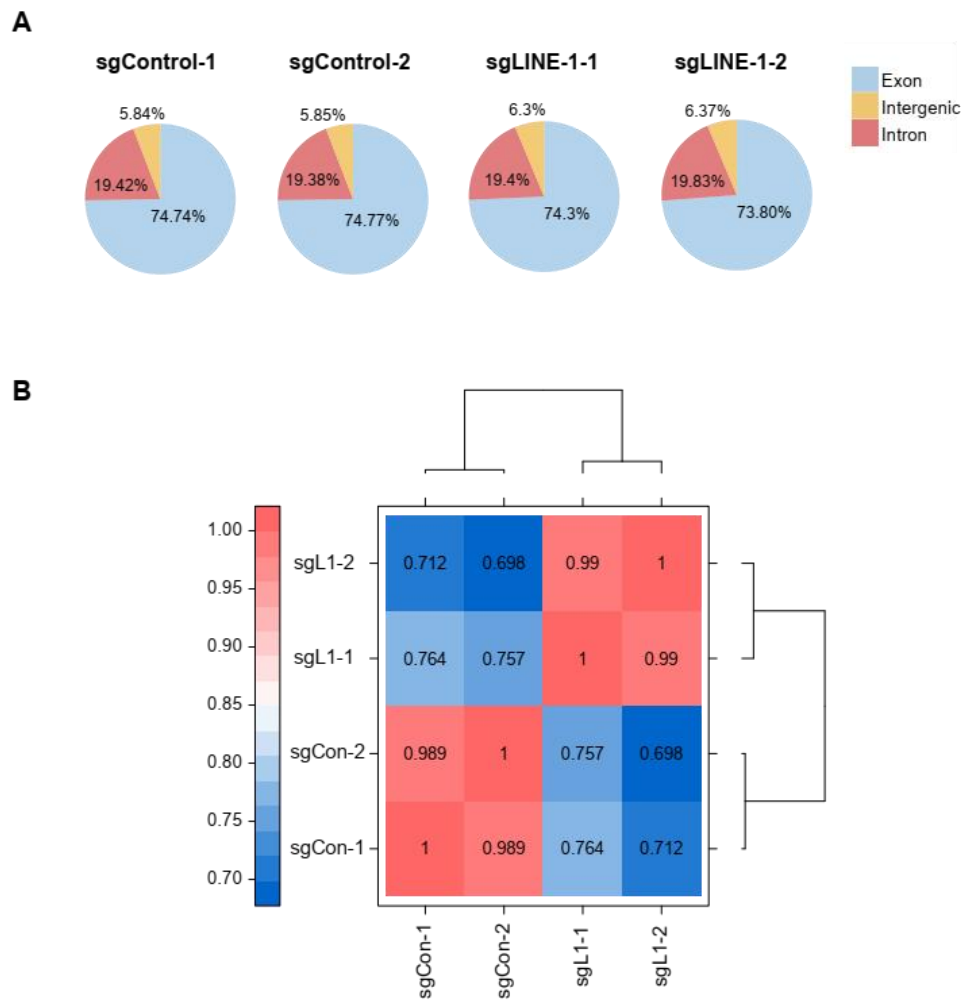

Supplementary Figure S1. Analysis of the CRISPRa data. (A) Pie chart displaying the genomic distribution of different reads from RNA-seq peaks. (B) Heat map representing Pearson correlations between control and dCas9-VP64 L02 cell lines, based on two replicates.

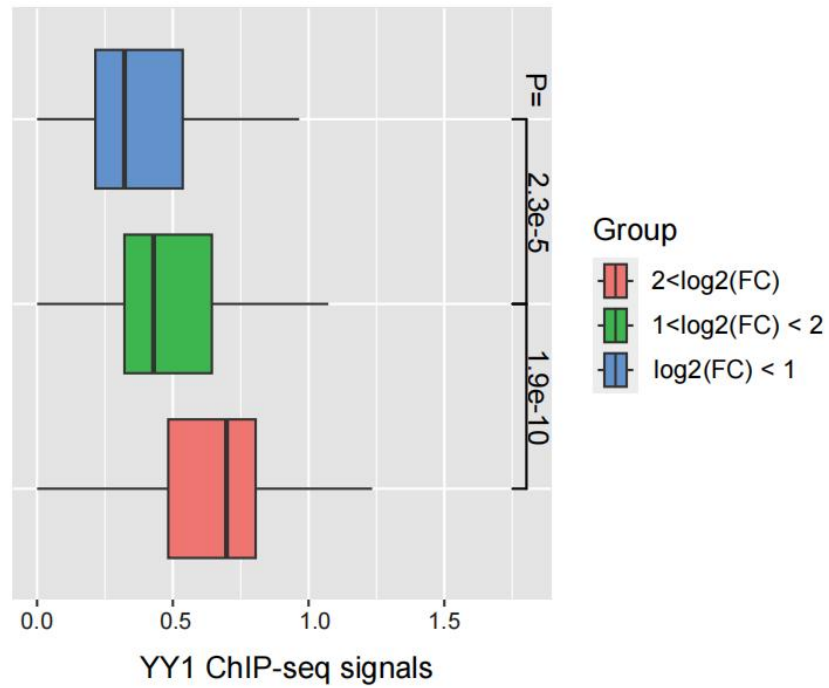

Supplementary Figure 2. The correlation between the YY1 ChIP-seq signals and the L1 expression. The young L1s after CRISPRa are divided into 3 groups: lowly expressed ( $\log_2$  fold change  $< 1$ ); medially expressed ( $1 < \log_2$  fold change  $< 2$ ); and highly expressed ( $\log_2$  fold change  $> 2$ ).
