# Supplementary material for: Activation of Young LINE-1 Elements by CRISPRa
Source: Int J Mol Sci. 2023 Dec 28;25(1):424. doi: 10.3390/ijms25010424 (PMC10778729; doi:10.3390/ijms25010424)
Supplement: Supplementary file 1 [file ijms-25-00424-s001.zip › ijms-2720840-supplementary.xlsx]

## Sheet: Table S1
Table S1 sgRNA sequences and its targeted LINE-1 subfamilies
Primer name	Sequence (5'-3')
sgLINE-1 No.1	TGGCCGAATAGGAACAGCTC
sgLINE-1 No.2	GCGTGAGCGACGCAGAAGAC
sgLINE-1 No.3	GAGTGCCAGACAGTGGGCGC
sgLINE-1 No.4	AGGGGCGCCCGCCATTGCCC
sgLINE-1 No.5	GTGGAGCCCACCACAGCTCA
sgLINE-1 No.6	TAGGCTCCACCTCTGGGGGC
sgLINE-1 No.7	GACAGCTTTGAAGAGAGCAG
sgLINE-1 No.8	GGCAGACTGCCTCCTCAAGT
sgLINE-1 No.9	CTGGGGGGTGCCTCCCAGTT
sgLINE-1 No.10	TGAGGGTCCTGTCTGTTAGA
sgLINE-1 No.11	GAGCTGTTCCTATTCGGCCA
sgLINE-1 No.12	GTCTTCTGCGTCGCTCACGC
sgLINE-1 No.13	GCGCCCACTGTCTGGCACTC
sgLINE-1 No.14	GGGCAATGGCGGGCGCCCCT
sgLINE-1 No.15	TGAGCTGTGGTGGGCTCCAC
sgLINE-1 No.16	GCCCCCAGAGGTGGAGCCTA
sgLINE-1 No.17	CTGCTCTCTTCAAAGCTGTC
sgLINE-1 No.18	ACTTGAGGAGGCAGTCTGCC
sgLINE-1 No.19	AACTGGGAGGCACCCCCCAG
sgLINE-1 No.20	TCTAACAGACAGGACCCTCA
sgLINE-1 No.21	TTCCAATCAATAGAAAAAGA
sgLINE-1 No.22	TTTGAGTTCATTGTAGATTC
sgLINE-1 No.23	GAAAAAATGCTCATCATCAC
sgLINE-1 No.24	GATTTCTGCATTTCCATCTG
sgLINE-1 No.25	GCATTTCCATCTGAGGTACC
sgLINE-1 No.26	GATGAACCCGGTACCTCAGA
sgLINE-1 No.27	GCCTCACCTGGGAAGCGCAA
sgLINE-1 No.28	GAATATTGCGCTTTTCAGAC
sgLINE-1 No.29	GCCGGGAAGCTCGAACTGGG
sgLINE-1 No.30	GACAGACTGCCTCCTCAAGT
sgLINE-1 No.31	GTAGATAAAACCACAAAGAT
sgLINE-1 No.32	GATGATGGTGATGTACAGAT
sgLINE-1 No.33	GTGATGTACAGATGGGTTTT

## Sheet: Table S2
Table S2 List of materials and reagents
Short	Full name	Vendor&CAS
trypsin-EDTA	trypsin-Ethylene Diamine Tetraacetic Acid	Sigma,T4049,USA
DMEM	Dulbecco’s Modification of Eagle’s Medium	BI,01-052-1ACS
FBS	Fetal Bovine Serum	Transgen Biotech,FS301-02
PEI	Polyethylenimine	MedChemExpress,HY-K2014
/	L-Glutamine	Sigma,G7513,USA
/	Penicillin-Streptomycin	Gibco,15140-122
/	lenti-EF1a-dCas9-VPR-Puro	Addgene #99373
/	lenti-EF1a-dCas9-VP64-Puro	Addgene #99371
/	psPAX2	Addgene #12260
/	pMD2.G	Addgene #12259
/	puromycin	Solarbio,P8230
/	TRIzol Reagent	ThermoScientific,15596026,USA
/	Trans-Lentiviral Packaging kit	ThermoScientific,TLP4614,USA
/	Lenti-X concentrator regents	Takara Bio,631231
/	Lentivirus titration kit	Takara Bio,631235

## Sheet: Table S3
Table S3 Coordinates of hg38 for each sgRNA
Chr	sgRNA_start	Sequence
chr7	57089082	TTTGAGTTCATTGTAGATTC
chr8	14583376	TTTGAGTTCATTGTAGATTC
chr12	91709144	TTTGAGTTCATTGTAGATTC
chr12	58227810	TTTGAGTTCATTGTAGATTC
chr6	112915238	TTTGAGTTCATTGTAGATTC
chr15	91580377	TTTGAGTTCATTGTAGATTC
chr14	41335908	TTTGAGTTCATTGTAGATTC
chr2	195931293	TTTGAGTTCATTGTAGATTC
chrX	98425198	TTTGAGTTCATTGTAGATTC
chr5	164928260	TTTGAGTTCATTGTAGATTC
chr6	60345616	TTTGAGTTCATTGTAGATTC
chr5	43742086	TTTGAGTTCATTGTAGATTC
chr15	37379390	TTTGAGTTCATTGTAGATTC
chr6	128922579	TTTGAGTTCATTGTAGATTC
chr11	87698971	TTTGAGTTCATTGTAGATTC
chr4	58230134	TTTGAGTTCATTGTAGATTC
chr1	246329562	TTTGAGTTCATTGTAGATTC
chr4	15113390	TTTGAGTTCATTGTAGATTC
chr1	72813746	TTTGAGTTCATTGTAGATTC
chr1	214930450	TTTGAGTTCATTGTAGATTC
chr7	127397692	TTTGAGTTCATTGTAGATTC
chr14	51313094	TTTGAGTTCATTGTAGATTC
chr4	80291406	TTTGAGTTCATTGTAGATTC
chr5	79096765	TTTGAGTTCATTGTAGATTC
chr11	25276201	TTTGAGTTCATTGTAGATTC
chr5	57472460	TTTGAGTTCATTGTAGATTC
chr14	45478010	TTTGAGTTCATTGTAGATTC
chr3	35127922	TTTGAGTTCATTGTAGATTC
chr5	165383898	TTTGAGTTCATTGTAGATTC
chr5	155436124	TTTGAGTTCATTGTAGATTC
chr6	70766617	TTTGAGTTCATTGTAGATTC
chr2	237248011	TTTGAGTTCATTGTAGATTC
chr10	84773927	TTTGAGTTCATTGTAGATTC
chr8	50508791	TTTGAGTTCATTGTAGATTC
chr14	60937097	TTTGAGTTCATTGTAGATTC
chr2	76591088	TTTGAGTTCATTGTAGATTC
chr7	48791903	TTTGAGTTCATTGTAGATTC
chrX	150132280	TTTGAGTTCATTGTAGATTC
chr1	191801300	TTTGAGTTCATTGTAGATTC
chr14	39551073	TTTGAGTTCATTGTAGATTC
chrX	65935145	TTTGAGTTCATTGTAGATTC
chr3	114662776	TTTGAGTTCATTGTAGATTC
chr4	31967635	TTTGAGTTCATTGTAGATTC
chrX	148170927	TTTGAGTTCATTGTAGATTC
chr3	175424138	TTTGAGTTCATTGTAGATTC
chr10	41775528	TTTGAGTTCATTGTAGATTC
chr18	60521695	TTTGAGTTCATTGTAGATTC
chr4	161551455	TTTGAGTTCATTGTAGATTC
chr2	132806641	TTTGAGTTCATTGTAGATTC
chr20	53456428	TTTGAGTTCATTGTAGATTC
chr21	16410859	TTTGAGTTCATTGTAGATTC
chr1	97557227	TTTGAGTTCATTGTAGATTC
chr7	122279786	TTTGAGTTCATTGTAGATTC
chr5	170965269	TTTGAGTTCATTGTAGATTC
chr2	94571076	TTTGAGTTCATTGTAGATTC
chr17	27059131	TTTGAGTTCATTGTAGATTC
chr2	131401784	TTTGAGTTCATTGTAGATTC
chr17	22340166	TTTGAGTTCATTGTAGATTC
chr7	149369409	TTTGAGTTCATTGTAGATTC
chr11	46156147	TTTGAGTTCATTGTAGATTC
chr9	17285876	TTTGAGTTCATTGTAGATTC
chr13	91604824	TTTGAGTTCATTGTAGATTC
chr4	43612524	TTTGAGTTCATTGTAGATTC
chrX	129157479	TTTGAGTTCATTGTAGATTC
chr18	20571554	TTTGAGTTCATTGTAGATTC
chr11	48392557	TTTGAGTTCATTGTAGATTC
chr18	49771941	TTTGAGTTCATTGTAGATTC
chr1	7412626	TTTGAGTTCATTGTAGATTC
chr1	180867684	TTTGAGTTCATTGTAGATTC
chr4	144027446	TTTGAGTTCATTGTAGATTC
chr4	37311505	TTTGAGTTCATTGTAGATTC
chr8	48944444	TTTGAGTTCATTGTAGATTC
chr1	78186833	TTTGAGTTCATTGTAGATTC
chr10	23851884	TTTGAGTTCATTGTAGATTC
chr3	158195369	TTTGAGTTCATTGTAGATTC
chr13	29642579	TTTGAGTTCATTGTAGATTC
chr20	18950838	TTTGAGTTCATTGTAGATTC
chr15	35276304	TTTGAGTTCATTGTAGATTC
chr7	78923064	TTTGAGTTCATTGTAGATTC
chr1	103046476	TTTGAGTTCATTGTAGATTC
chr18	45794937	TTTGAGTTCATTGTAGATTC
chrX	88782286	TTTGAGTTCATTGTAGATTC
chr11	28373488	TTTGAGTTCATTGTAGATTC
chrX	66315252	TTTGAGTTCATTGTAGATTC
chrX	125609818	TTTGAGTTCATTGTAGATTC
chr1	58374050	TTTGAGTTCATTGTAGATTC
chr4	56332124	TTTGAGTTCATTGTAGATTC
chr4	106535981	TTTGAGTTCATTGTAGATTC
chr10	108311003	TTTGAGTTCATTGTAGATTC
chr18	22820187	TTTGAGTTCATTGTAGATTC
chr7	83990189	TTTGAGTTCATTGTAGATTC
chr1	153005493	TTTGAGTTCATTGTAGATTC
chr5	152654836	TTTGAGTTCATTGTAGATTC
chr8	67652610	TTTGAGTTCATTGTAGATTC
chr13	75709670	TTTGAGTTCATTGTAGATTC
chrX	80005772	TTTGAGTTCATTGTAGATTC
chr13	66254634	TTTGAGTTCATTGTAGATTC
chr8	2800763	TTTGAGTTCATTGTAGATTC
chr12	33243461	TTTGAGTTCATTGTAGATTC
chr9	34762568	TTTGAGTTCATTGTAGATTC
chr1	109743647	TTTGAGTTCATTGTAGATTC
chr12	60017494	TTTGAGTTCATTGTAGATTC
chr8	127108633	TTTGAGTTCATTGTAGATTC
chr7	81422395	TTTGAGTTCATTGTAGATTC
chr2	194974225	TTTGAGTTCATTGTAGATTC
chr7	124463596	TTTGAGTTCATTGTAGATTC
chr1	102928962	TTTGAGTTCATTGTAGATTC
chr5	110172936	TTTGAGTTCATTGTAGATTC
chr12	75002224	TTTGAGTTCATTGTAGATTC
chr3	63017452	TTTGAGTTCATTGTAGATTC
chr2	131021057	TTTGAGTTCATTGTAGATTC
chr11	39485444	TTTGAGTTCATTGTAGATTC
chr4	175533503	TTTGAGTTCATTGTAGATTC
chr2	51736073	TTTGAGTTCATTGTAGATTC
chr1	72388765	TTTGAGTTCATTGTAGATTC
chr9	115768957	TTTGAGTTCATTGTAGATTC
chr7	107647199	TTTGAGTTCATTGTAGATTC
chr10	52731222	TTTGAGTTCATTGTAGATTC
chr6	122378097	TTTGAGTTCATTGTAGATTC
chr5	41565402	TTTGAGTTCATTGTAGATTC
chr5	125919284	TTTGAGTTCATTGTAGATTC
chr10	86273783	TTTGAGTTCATTGTAGATTC
chr8	67590756	TTTGAGTTCATTGTAGATTC
chr10	62173553	TTTGAGTTCATTGTAGATTC
chr4	70373974	TTTGAGTTCATTGTAGATTC
chr22	10931382	TTTGAGTTCATTGTAGATTC
chr2	76091518	TTTGAGTTCATTGTAGATTC
chr3	110912306	TTTGAGTTCATTGTAGATTC
chrX	47784543	TTTGAGTTCATTGTAGATTC
chr3	104120342	TTTGAGTTCATTGTAGATTC
chr2	37494637	TTTGAGTTCATTGTAGATTC
chr3	19591128	TTTGAGTTCATTGTAGATTC
chr19	15713892	TTTGAGTTCATTGTAGATTC
chrX	79224782	TTTGAGTTCATTGTAGATTC
chrX	86350244	TTTGAGTTCATTGTAGATTC
chr4	69429800	TTTGAGTTCATTGTAGATTC
chr8	46984680	TTTGAGTTCATTGTAGATTC
chr14	45350057	TTTGAGTTCATTGTAGATTC
chr11	94239027	TTTGAGTTCATTGTAGATTC
chr2	51382068	TTTGAGTTCATTGTAGATTC
chr2	125417675	TTTGAGTTCATTGTAGATTC
chr7	110656000	TTTGAGTTCATTGTAGATTC
chr7	61838894	TTTGAGTTCATTGTAGATTC
chr1	49832864	TTTGAGTTCATTGTAGATTC
chr14	57668201	TTTGAGTTCATTGTAGATTC
chr6	143303096	TTTGAGTTCATTGTAGATTC
chrX	108542979	TTTGAGTTCATTGTAGATTC
chr4	127531256	TTTGAGTTCATTGTAGATTC
chr21	9334593	TTTGAGTTCATTGTAGATTC
chr18	54413910	TTTGAGTTCATTGTAGATTC
chr13	21856594	TTTGAGTTCATTGTAGATTC
chr8	108501166	TTTGAGTTCATTGTAGATTC
chr11	32942103	TTTGAGTTCATTGTAGATTC
chr5	101913718	TTTGAGTTCATTGTAGATTC
chr8	74471118	TTTGAGTTCATTGTAGATTC
chr2	173528162	TTTGAGTTCATTGTAGATTC
chr7	141980955	TTTGAGTTCATTGTAGATTC
chr6	161505396	TTTGAGTTCATTGTAGATTC
chr3	162379926	TTTGAGTTCATTGTAGATTC
chr2	89998103	TTTGAGTTCATTGTAGATTC
chr15	97291035	TTTGAGTTCATTGTAGATTC
chr7	61599786	TTTGAGTTCATTGTAGATTC
chr17	53531949	TTTGAGTTCATTGTAGATTC
chr3	177660232	TTTGAGTTCATTGTAGATTC
chr1	178805149	TTTGAGTTCATTGTAGATTC
chrX	65119517	TTTGAGTTCATTGTAGATTC
chr1	100677796	TTTGAGTTCATTGTAGATTC
chr8	54692688	TTTGAGTTCATTGTAGATTC
chr16	31630734	TTTGAGTTCATTGTAGATTC
chr6	100070473	TTTGAGTTCATTGTAGATTC
chr2	223355439	TTTGAGTTCATTGTAGATTC
chr6	74209314	TTTGAGTTCATTGTAGATTC
chr13	47730291	TTTGAGTTCATTGTAGATTC
chr10	104720847	TTTGAGTTCATTGTAGATTC
chrY	19834970	TTTGAGTTCATTGTAGATTC
chr4	163413277	TTTGAGTTCATTGTAGATTC
chr7	18136174	TTTGAGTTCATTGTAGATTC
chrY	20473879	TTTGAGTTCATTGTAGATTC
chr6	77799364	TTTGAGTTCATTGTAGATTC
chr11	48745565	TTTGAGTTCATTGTAGATTC
chr2	57381175	TTTGAGTTCATTGTAGATTC
chr1	193445850	TTTGAGTTCATTGTAGATTC
chr18	68227500	TTTGAGTTCATTGTAGATTC
chr12	45084983	TTTGAGTTCATTGTAGATTC
chrX	74673217	TTTGAGTTCATTGTAGATTC
chrX	103897985	TTTGAGTTCATTGTAGATTC
chr1	146789575	TTTGAGTTCATTGTAGATTC
chr6	4199388	TTTGAGTTCATTGTAGATTC
chr4	139429044	TTTGAGTTCATTGTAGATTC
chr5	27210109	TTTGAGTTCATTGTAGATTC
chr1	113474134	TTTGAGTTCATTGTAGATTC
chrX	81340752	TTTGAGTTCATTGTAGATTC
chr10	58737959	TTTGAGTTCATTGTAGATTC
chr6	77731499	TTTGAGTTCATTGTAGATTC
chr3	146733622	TTTGAGTTCATTGTAGATTC
chr9	70199922	TTTGAGTTCATTGTAGATTC
chr9	69680919	TTTGAGTTCATTGTAGATTC
chr10	62673087	TTTGAGTTCATTGTAGATTC
chr12	73148491	TTTGAGTTCATTGTAGATTC
chr12	83788214	TTTGAGTTCATTGTAGATTC
chrY	15737112	TTTGAGTTCATTGTAGATTC
chrY	17540239	TTTGAGTTCATTGTAGATTC
chr5	97810784	TTTGAGTTCATTGTAGATTC
chr3	191465980	TTTGAGTTCATTGTAGATTC
chr1	103020460	TTTGAGTTCATTGTAGATTC
chr2	98265915	TTTGAGTTCATTGTAGATTC
chr4	37939393	TTTGAGTTCATTGTAGATTC
chr2	95998892	TTTGAGTTCATTGTAGATTC
chr4	157275239	TTTGAGTTCATTGTAGATTC
chr9	76279784	TTTGAGTTCATTGTAGATTC
chr13	51691067	TTTGAGTTCATTGTAGATTC
chr8	122327542	TTTGAGTTCATTGTAGATTC
chr2	153434700	TTTGAGTTCATTGTAGATTC
chr7	89194184	TTTGAGTTCATTGTAGATTC
chr5	166547777	TTTGAGTTCATTGTAGATTC
chr11	5867715	TTTGAGTTCATTGTAGATTC
chr8	83440119	TTTGAGTTCATTGTAGATTC
chr4	20105221	TTTGAGTTCATTGTAGATTC
chr13	75033153	TTTGAGTTCATTGTAGATTC
chr10	109086410	TTTGAGTTCATTGTAGATTC
chr1	217691361	TTTGAGTTCATTGTAGATTC
chr6	136851872	TTTGAGTTCATTGTAGATTC
chr5	16633514	TTTGAGTTCATTGTAGATTC
chr3	59355654	TTTGAGTTCATTGTAGATTC
chr3	39985096	TTTGAGTTCATTGTAGATTC
chr2	194835461	TTTGAGTTCATTGTAGATTC
chr2	109308294	TTTGAGTTCATTGTAGATTC
chr15	81636061	TTTGAGTTCATTGTAGATTC
chr3	167518605	TTTGAGTTCATTGTAGATTC
chr1	169604322	TTTGAGTTCATTGTAGATTC
chr3	75845865	TTTGAGTTCATTGTAGATTC
chr19	24406788	TTTGAGTTCATTGTAGATTC
chr6	107855588	TTTGAGTTCATTGTAGATTC
chr2	215735032	TTTGAGTTCATTGTAGATTC
chr4	169516374	TTTGAGTTCATTGTAGATTC
chr8	126981374	TTTGAGTTCATTGTAGATTC
chr4	72164646	TTTGAGTTCATTGTAGATTC
chr6	159548085	TTTGAGTTCATTGTAGATTC
chr7	19901422	TTTGAGTTCATTGTAGATTC
chr20	30883749	TTTGAGTTCATTGTAGATTC
chr11	102742308	TTTGAGTTCATTGTAGATTC
chrX	121362626	TTTGAGTTCATTGTAGATTC
chr9	83862046	TTTGAGTTCATTGTAGATTC
chr1	77854766	TTTGAGTTCATTGTAGATTC
chr5	175137295	TTTGAGTTCATTGTAGATTC
chr6	111903865	TTTGAGTTCATTGTAGATTC
chr1	43115381	TTTGAGTTCATTGTAGATTC
chr13	36487069	TTTGAGTTCATTGTAGATTC
chr17	46953906	TTTGAGTTCATTGTAGATTC
chr6	151847611	TTTGAGTTCATTGTAGATTC
chr11	24388294	TTTGAGTTCATTGTAGATTC
chr10	63945511	TTTGAGTTCATTGTAGATTC
chr8	136438946	TTTGAGTTCATTGTAGATTC
chr18	14789261	TTTGAGTTCATTGTAGATTC
chr14	45770792	TTTGAGTTCATTGTAGATTC
chr5	128294709	TTTGAGTTCATTGTAGATTC
chr11	134114064	TTTGAGTTCATTGTAGATTC
chr4	64860013	TTTGAGTTCATTGTAGATTC
chrX	74688202	TTTGAGTTCATTGTAGATTC
chr13	101599307	TTTGAGTTCATTGTAGATTC
chr7	33989486	TTTGAGTTCATTGTAGATTC
chr6	50932802	TTTGAGTTCATTGTAGATTC
chr14	60422052	TTTGAGTTCATTGTAGATTC
chr6	103557444	TTTGAGTTCATTGTAGATTC
chr2	117906001	TTTGAGTTCATTGTAGATTC
chr7	45948271	TTTGAGTTCATTGTAGATTC
chr8	87484768	TTTGAGTTCATTGTAGATTC
chr4	80890932	TTTGAGTTCATTGTAGATTC
chr7	115262098	TTTGAGTTCATTGTAGATTC
chr7	152627863	TTTGAGTTCATTGTAGATTC
chr3	30412304	TTTGAGTTCATTGTAGATTC
chr2	236437813	TTTGAGTTCATTGTAGATTC
chr18	15367843	TTTGAGTTCATTGTAGATTC
chr16	47837588	TTTGAGTTCATTGTAGATTC
chr11	23028984	TTTGAGTTCATTGTAGATTC
chr2	13947367	TTTGAGTTCATTGTAGATTC
chr5	7604688	TTTGAGTTCATTGTAGATTC
chr1	83339900	TTTGAGTTCATTGTAGATTC
chr1	176309250	TTTGAGTTCATTGTAGATTC
chr4	93609183	TTTGAGTTCATTGTAGATTC
chr8	114640992	TTTGAGTTCATTGTAGATTC
chrX	57718651	TTTGAGTTCATTGTAGATTC
chr13	79817924	TTTGAGTTCATTGTAGATTC
chr2	137071428	TTTGAGTTCATTGTAGATTC
chr9	4948578	TTTGAGTTCATTGTAGATTC
chr4	153102293	TTTGAGTTCATTGTAGATTC
chr14	51795474	TTTGAGTTCATTGTAGATTC
chr4	52514789	TTTGAGTTCATTGTAGATTC
chrX	83084537	TTTGAGTTCATTGTAGATTC
chr7	89459875	TTTGAGTTCATTGTAGATTC
chrX	86855210	TTTGAGTTCATTGTAGATTC
chr18	60629351	TTTGAGTTCATTGTAGATTC
chr2	175482838	TTTGAGTTCATTGTAGATTC
chr4	106571914	TTTGAGTTCATTGTAGATTC
chr11	114840693	TTTGAGTTCATTGTAGATTC
chr1	74241647	TTTGAGTTCATTGTAGATTC
chr4	110871669	TTTGAGTTCATTGTAGATTC
chr11	38942292	TTTGAGTTCATTGTAGATTC
chr18	77416849	TTTGAGTTCATTGTAGATTC
chrX	64951671	TTTGAGTTCATTGTAGATTC
chr12	127748	TTTGAGTTCATTGTAGATTC
chr5	153071855	TTTGAGTTCATTGTAGATTC
chr17	41085783	TTTGAGTTCATTGTAGATTC
chrX	150169773	TTTGAGTTCATTGTAGATTC
chr10	17486322	TTTGAGTTCATTGTAGATTC
chr4	46678554	TTTGAGTTCATTGTAGATTC
chr14	60909194	TTTGAGTTCATTGTAGATTC
chr6	73090281	TTTGAGTTCATTGTAGATTC
chr5	83458673	TTTGAGTTCATTGTAGATTC
chr12	60503227	TTTGAGTTCATTGTAGATTC
chr6	101873967	TTTGAGTTCATTGTAGATTC
chrX	56325830	TTTGAGTTCATTGTAGATTC
chr3	179620069	TTTGAGTTCATTGTAGATTC
chr9	30428381	TTTGAGTTCATTGTAGATTC
chr5	106771853	TTTGAGTTCATTGTAGATTC
chr6	76901085	TTTGAGTTCATTGTAGATTC
chr6	124358643	TTTGAGTTCATTGTAGATTC
chrX	66960973	TTTGAGTTCATTGTAGATTC
chr4	65289105	TTTGAGTTCATTGTAGATTC
chr3	144739441	TTTGAGTTCATTGTAGATTC
chr2	125027510	TTTGAGTTCATTGTAGATTC
chrX	76575358	TTTGAGTTCATTGTAGATTC
chr10	92967160	TTTGAGTTCATTGTAGATTC
chr12	11213477	TTTGAGTTCATTGTAGATTC
chr4	60481416	TTTGAGTTCATTGTAGATTC
chr10	15916604	TTTGAGTTCATTGTAGATTC
chr4	179680523	TTTGAGTTCATTGTAGATTC
chr14	44552420	TTTGAGTTCATTGTAGATTC
chr20	5380527	TTTGAGTTCATTGTAGATTC
chr1	174202522	TTTGAGTTCATTGTAGATTC
chr2	24801198	TTTGAGTTCATTGTAGATTC
chrX	91972319	TTTGAGTTCATTGTAGATTC
chr8	84616463	TTTGAGTTCATTGTAGATTC
chr9	13302370	TTTGAGTTCATTGTAGATTC
chr2	210984081	TTTGAGTTCATTGTAGATTC
chrX	115669575	TTTGAGTTCATTGTAGATTC
chr3	63212581	TTTGAGTTCATTGTAGATTC
chr5	66445149	TTTGAGTTCATTGTAGATTC
chrX	127117570	TTTGAGTTCATTGTAGATTC
chr1	14383186	TTTGAGTTCATTGTAGATTC
chr19	43878453	TTTGAGTTCATTGTAGATTC
chr2	106901684	TTTGAGTTCATTGTAGATTC
chr12	69774283	TTTGAGTTCATTGTAGATTC
chr10	39251411	TTTGAGTTCATTGTAGATTC
chrX	66467480	TTTGAGTTCATTGTAGATTC
chr13	97156268	TTTGAGTTCATTGTAGATTC
chr1	66087365	TTTGAGTTCATTGTAGATTC
chr9	32212700	TTTGAGTTCATTGTAGATTC
chr7	56839279	TTTGAGTTCATTGTAGATTC
chr2	161590897	TTTGAGTTCATTGTAGATTC
chr12	117249067	TTTGAGTTCATTGTAGATTC
chr4	112193218	TTTGAGTTCATTGTAGATTC
chr9	28112781	TTTGAGTTCATTGTAGATTC
chr4	182779926	TTTGAGTTCATTGTAGATTC
chr12	51560458	TTTGAGTTCATTGTAGATTC
chrY	22227813	TTTGAGTTCATTGTAGATTC
chr14	45546598	TTTGAGTTCATTGTAGATTC
chr5	78453056	TTTGAGTTCATTGTAGATTC
chr1	153454138	TTTGAGTTCATTGTAGATTC
KI270726.1	34550	TTTGAGTTCATTGTAGATTC
chr4	102698227	TTTGAGTTCATTGTAGATTC
chr7	72220914	TTTGAGTTCATTGTAGATTC
chrX	80001011	TTTGAGTTCATTGTAGATTC
chr4	96796301	TTTGAGTTCATTGTAGATTC
chrX	145358279	TTTGAGTTCATTGTAGATTC
chrX	27023150	TTTGAGTTCATTGTAGATTC
chr5	119294912	TTTGAGTTCATTGTAGATTC
chr21	24535242	TTTGAGTTCATTGTAGATTC
chr10	110247257	TTTGAGTTCATTGTAGATTC
chr3	89869917	TTTGAGTTCATTGTAGATTC
chr5	4470518	TTTGAGTTCATTGTAGATTC
chr5	141230194	TTTGAGTTCATTGTAGATTC
chr21	20158456	TTTGAGTTCATTGTAGATTC
chr7	118413406	TTTGAGTTCATTGTAGATTC
chr3	190287279	TTTGAGTTCATTGTAGATTC
chr13	58512819	TTTGAGTTCATTGTAGATTC
chr8	40721850	TTTGAGTTCATTGTAGATTC
chrX	7588464	TTTGAGTTCATTGTAGATTC
chr6	32264991	TTTGAGTTCATTGTAGATTC
chr5	45858240	TTTGAGTTCATTGTAGATTC
chr5	99181786	TTTGAGTTCATTGTAGATTC
chr7	39008393	TTTGAGTTCATTGTAGATTC
chr6	30081472	TTTGAGTTCATTGTAGATTC
chr7	24584533	TTTGAGTTCATTGTAGATTC
chr19	24414641	TTTGAGTTCATTGTAGATTC
chrX	56336516	TTTGAGTTCATTGTAGATTC
chr16	62553249	TTTGAGTTCATTGTAGATTC
chr10	109796398	TTTGAGTTCATTGTAGATTC
chr5	44825379	TTTGAGTTCATTGTAGATTC
chr3	121346823	TTTGAGTTCATTGTAGATTC
chr4	133787531	TTTGAGTTCATTGTAGATTC
chr7	109095513	TTTGAGTTCATTGTAGATTC
chr6	110156425	TTTGAGTTCATTGTAGATTC
chr8	23646062	TTTGAGTTCATTGTAGATTC
chr6	52091814	TTTGAGTTCATTGTAGATTC
chr7	95566934	TTTGAGTTCATTGTAGATTC
chr10	31107254	TTTGAGTTCATTGTAGATTC
chr1	70610912	TTTGAGTTCATTGTAGATTC
chr15	53381434	TTTGAGTTCATTGTAGATTC
chr6	49792356	TTTGAGTTCATTGTAGATTC
chr11	29868781	TTTGAGTTCATTGTAGATTC
chr8	25655805	TTTGAGTTCATTGTAGATTC
chrX	102231349	TTTGAGTTCATTGTAGATTC
chrX	78259515	TTTGAGTTCATTGTAGATTC
chrX	83918037	TTTGAGTTCATTGTAGATTC
chr5	50596980	TTTGAGTTCATTGTAGATTC
chr12	21798534	TTTGAGTTCATTGTAGATTC
chr8	87378024	TTTGAGTTCATTGTAGATTC
chr19	34701248	TTTGAGTTCATTGTAGATTC
chr20	26341818	TTTGAGTTCATTGTAGATTC
chr11	87457923	TTTGAGTTCATTGTAGATTC
chr10	83899180	TTTGAGTTCATTGTAGATTC
chr17	27100026	TTTGAGTTCATTGTAGATTC
chr1	27820381	TTTGAGTTCATTGTAGATTC
chr1	247889189	TTTGAGTTCATTGTAGATTC
chr10	59796344	TTTGAGTTCATTGTAGATTC
chr12	126299883	TTTGAGTTCATTGTAGATTC
chr1	102511898	TTTGAGTTCATTGTAGATTC
chr11	122541856	TTTGAGTTCATTGTAGATTC
chr3	18958676	TTTGAGTTCATTGTAGATTC
chr5	145416152	TTTGAGTTCATTGTAGATTC
chr12	72372261	TTTGAGTTCATTGTAGATTC
chr8	117349874	TTTGAGTTCATTGTAGATTC
chr3	101199039	TTTGAGTTCATTGTAGATTC
chr11	58697165	TTTGAGTTCATTGTAGATTC
chr2	56162670	TTTGAGTTCATTGTAGATTC
chr7	153311214	TTTGAGTTCATTGTAGATTC
chr2	81028513	TTTGAGTTCATTGTAGATTC
chr3	74933572	TTTGAGTTCATTGTAGATTC
chr11	37901398	TTTGAGTTCATTGTAGATTC
chr10	105378219	TTTGAGTTCATTGTAGATTC
chr1	74873171	TTTGAGTTCATTGTAGATTC
chr10	84859057	TTTGAGTTCATTGTAGATTC
chr2	209332984	TTTGAGTTCATTGTAGATTC
chr14	18272460	TTTGAGTTCATTGTAGATTC
chr2	192429692	TTTGAGTTCATTGTAGATTC
chr2	116120578	TTTGAGTTCATTGTAGATTC
chr1	118705292	TTTGAGTTCATTGTAGATTC
chr13	74236812	TTTGAGTTCATTGTAGATTC
chr22	25340959	TTTGAGTTCATTGTAGATTC
chrX	93030226	TTTGAGTTCATTGTAGATTC
chr5	162031798	TTTGAGTTCATTGTAGATTC
chr6	134546353	TTTGAGTTCATTGTAGATTC
chr2	150180206	TTTGAGTTCATTGTAGATTC
chr1	78244419	TTTGAGTTCATTGTAGATTC
chr10	75559403	TTTGAGTTCATTGTAGATTC
chr7	62125335	TTTGAGTTCATTGTAGATTC
chr7	110266765	TTTGAGTTCATTGTAGATTC
chrX	36466066	TTTGAGTTCATTGTAGATTC
chr7	65663921	TTTGAGTTCATTGTAGATTC
chr15	62048974	TTTGAGTTCATTGTAGATTC
chr12	60809445	TTTGAGTTCATTGTAGATTC
chr15	27188598	TTTGAGTTCATTGTAGATTC
chr15	20032802	TTTGAGTTCATTGTAGATTC
chr9	1190681	TTTGAGTTCATTGTAGATTC
chrY	14947597	TTTGAGTTCATTGTAGATTC
chr5	137045515	TTTGAGTTCATTGTAGATTC
chr6	66841396	TTTGAGTTCATTGTAGATTC
chr6	77083346	TTTGAGTTCATTGTAGATTC
chr5	58052036	TTTGAGTTCATTGTAGATTC
chr2	36113379	TTTGAGTTCATTGTAGATTC
chr12	41210218	TTTGAGTTCATTGTAGATTC
chr3	112660019	TTTGAGTTCATTGTAGATTC
chr11	110659431	TTTGAGTTCATTGTAGATTC
chr9	106538639	TTTGAGTTCATTGTAGATTC
chr2	13642243	TTTGAGTTCATTGTAGATTC
chr11	125712376	TTTGAGTTCATTGTAGATTC
chr8	14719725	TTTGAGTTCATTGTAGATTC
chr20	15694588	TTTGAGTTCATTGTAGATTC
chr21	9859304	TTTGAGTTCATTGTAGATTC
chr15	37313495	TTTGAGTTCATTGTAGATTC
chr7	95078851	TTTGAGTTCATTGTAGATTC
chrX	104540395	TTTGAGTTCATTGTAGATTC
chr13	93491391	TTTGAGTTCATTGTAGATTC
chr4	180238606	TTTGAGTTCATTGTAGATTC
chrX	3122763	TTTGAGTTCATTGTAGATTC
chr7	62266602	TTTGAGTTCATTGTAGATTC
chrX	56630444	TTTGAGTTCATTGTAGATTC
chr6	145995640	TTTGAGTTCATTGTAGATTC
chrX	94826241	TTTGAGTTCATTGTAGATTC
chr7	96580840	TTTGAGTTCATTGTAGATTC
chr13	80982992	TTTGAGTTCATTGTAGATTC
chr4	91859206	TTTGAGTTCATTGTAGATTC
chr5	20645152	TTTGAGTTCATTGTAGATTC
chr22	32295527	TTTGAGTTCATTGTAGATTC
chr8	66025298	TTTGAGTTCATTGTAGATTC
chr9	105577039	TTTGAGTTCATTGTAGATTC
chrX	43650512	TTTGAGTTCATTGTAGATTC
chr17	52656037	TTTGAGTTCATTGTAGATTC
chrX	76651713	TTTGAGTTCATTGTAGATTC
chr8	140498340	TTTGAGTTCATTGTAGATTC
chr11	109879238	TTTGAGTTCATTGTAGATTC
chr4	14207968	TTTGAGTTCATTGTAGATTC
chrY	16406288	TTTGAGTTCATTGTAGATTC
chr9	106549246	TTTGAGTTCATTGTAGATTC
chr1	118569099	TTTGAGTTCATTGTAGATTC
chr2	16594599	TTTGAGTTCATTGTAGATTC
chr3	93802260	TTTGAGTTCATTGTAGATTC
chr3	165427427	TTTGAGTTCATTGTAGATTC
chr3	44693241	TTTGAGTTCATTGTAGATTC
chrX	56836532	TTTGAGTTCATTGTAGATTC
chr5	57460771	TTTGAGTTCATTGTAGATTC
chr12	51605967	TTTGAGTTCATTGTAGATTC
chr16	10287598	TTTGAGTTCATTGTAGATTC
chr5	110213739	TTTGAGTTCATTGTAGATTC
chr20	55497967	TTTGAGTTCATTGTAGATTC
chr8	121025797	TTTGAGTTCATTGTAGATTC
chr6	57269501	TTTGAGTTCATTGTAGATTC
chr6	93866625	TTTGAGTTCATTGTAGATTC
chr19	39628926	TTTGAGTTCATTGTAGATTC
chrX	95600762	TTTGAGTTCATTGTAGATTC
chr12	75247037	TTTGAGTTCATTGTAGATTC
chrX	1704641	TTTGAGTTCATTGTAGATTC
chr4	72426205	TTTGAGTTCATTGTAGATTC
chr3	124153989	TTTGAGTTCATTGTAGATTC
chr11	49794027	TTTGAGTTCATTGTAGATTC
chr13	111019377	TTTGAGTTCATTGTAGATTC
chr3	118141636	TTTGAGTTCATTGTAGATTC
chr12	16378017	TTTGAGTTCATTGTAGATTC
chrX	55682026	TTTGAGTTCATTGTAGATTC
chr11	55330161	TTTGAGTTCATTGTAGATTC
chr2	95252957	TTTGAGTTCATTGTAGATTC
chr15	84388915	TTTGAGTTCATTGTAGATTC
chr2	185058569	TTTGAGTTCATTGTAGATTC
chr20	55380865	TTTGAGTTCATTGTAGATTC
chrX	58134141	TTTGAGTTCATTGTAGATTC
chr5	52247588	TTTGAGTTCATTGTAGATTC
chr12	20983499	TTTGAGTTCATTGTAGATTC
chr4	128399013	TTTGAGTTCATTGTAGATTC
chr6	61207233	TTTGAGTTCATTGTAGATTC
chr2	109112504	TTTGAGTTCATTGTAGATTC
chr2	115800306	TTTGAGTTCATTGTAGATTC
chr18	4473016	TTTGAGTTCATTGTAGATTC
chr12	59479542	TTTGAGTTCATTGTAGATTC
chr4	80844625	TTTGAGTTCATTGTAGATTC
chrX	36597078	TTTGAGTTCATTGTAGATTC
chr6	131856360	TTTGAGTTCATTGTAGATTC
chr9	85812166	TTTGAGTTCATTGTAGATTC
chr1	191832021	TTTGAGTTCATTGTAGATTC
chr5	139083551	TTTGAGTTCATTGTAGATTC
chr8	135848203	TTTGAGTTCATTGTAGATTC
chr11	49712751	TTTGAGTTCATTGTAGATTC
chr13	85912662	TTTGAGTTCATTGTAGATTC
chr9	21374248	TTTGAGTTCATTGTAGATTC
chrX	111573427	TTTGAGTTCATTGTAGATTC
chr2	197260948	TTTGAGTTCATTGTAGATTC
chr8	132297262	TTTGAGTTCATTGTAGATTC
chr1	79014732	TTTGAGTTCATTGTAGATTC
chr1	162100504	TTTGAGTTCATTGTAGATTC
chr6	61637905	TTTGAGTTCATTGTAGATTC
chr15	86967197	TTTGAGTTCATTGTAGATTC
chr8	118718586	TTTGAGTTCATTGTAGATTC
chrX	6753846	TTTGAGTTCATTGTAGATTC
chr3	174829987	TTTGAGTTCATTGTAGATTC
chr2	184948167	TTTGAGTTCATTGTAGATTC
chr10	9486070	TTTGAGTTCATTGTAGATTC
chr13	60742624	TTTGAGTTCATTGTAGATTC
chr18	55888284	TTTGAGTTCATTGTAGATTC
chr2	74797171	TTTGAGTTCATTGTAGATTC
chr1	95293110	TTTGAGTTCATTGTAGATTC
chr9	35246221	TTTGAGTTCATTGTAGATTC
chr4	52238774	TTTGAGTTCATTGTAGATTC
chr18	40325274	TTTGAGTTCATTGTAGATTC
chr1	84441427	TTTGAGTTCATTGTAGATTC
chr3	183235569	TTTGAGTTCATTGTAGATTC
chr11	104251966	TTTGAGTTCATTGTAGATTC
chr13	77684083	TTTGAGTTCATTGTAGATTC
chr5	28502925	TTTGAGTTCATTGTAGATTC
chr6	92983370	TTTGAGTTCATTGTAGATTC
chr20	4387404	TTTGAGTTCATTGTAGATTC
chr3	37372582	TTTGAGTTCATTGTAGATTC
chr4	45259905	TTTGAGTTCATTGTAGATTC
chr1	42895145	TTTGAGTTCATTGTAGATTC
chr3	75092853	TTTGAGTTCATTGTAGATTC
chr3	168771089	TTTGAGTTCATTGTAGATTC
chr3	68077179	TTTGAGTTCATTGTAGATTC
chr4	167344385	TTTGAGTTCATTGTAGATTC
chrX	83620278	TTTGAGTTCATTGTAGATTC
chr5	156973685	TTTGAGTTCATTGTAGATTC
chr7	32824732	TTTGAGTTCATTGTAGATTC
chr21	33926477	TTTGAGTTCATTGTAGATTC
chr11	101149898	TTTGAGTTCATTGTAGATTC
chr1	98859719	TTTGAGTTCATTGTAGATTC
chr10	41818317	TTTGAGTTCATTGTAGATTC
chr8	41503283	TTTGAGTTCATTGTAGATTC
chr2	124594007	TTTGAGTTCATTGTAGATTC
chr1	104819010	TTTGAGTTCATTGTAGATTC
chr7	91390358	TTTGAGTTCATTGTAGATTC
chr6	72989527	TTTGAGTTCATTGTAGATTC
chr3	96710889	TTTGAGTTCATTGTAGATTC
chrY	19678954	TTTGAGTTCATTGTAGATTC
chr7	63535153	TTTGAGTTCATTGTAGATTC
chr1	248514980	TTTGAGTTCATTGTAGATTC
chr4	170255689	TTTGAGTTCATTGTAGATTC
chr12	19729553	TTTGAGTTCATTGTAGATTC
chr11	48562451	TTTGAGTTCATTGTAGATTC
chr5	35569098	TTTGAGTTCATTGTAGATTC
chr2	105587272	TTTGAGTTCATTGTAGATTC
chrX	79718548	TTTGAGTTCATTGTAGATTC
chr3	109456789	TTTGAGTTCATTGTAGATTC
chr8	59870670	TTTGAGTTCATTGTAGATTC
chr6	152709731	TTTGAGTTCATTGTAGATTC
chr8	121051563	TTTGAGTTCATTGTAGATTC
chr8	43413211	TTTGAGTTCATTGTAGATTC
chr3	40903276	TTTGAGTTCATTGTAGATTC
chr16	35609348	TTTGAGTTCATTGTAGATTC
chr11	50324976	TTTGAGTTCATTGTAGATTC
chr15	76711808	TTTGAGTTCATTGTAGATTC
chr5	127747978	TTTGAGTTCATTGTAGATTC
chr6	122587894	TTTGAGTTCATTGTAGATTC
chr1	166240844	TTTGAGTTCATTGTAGATTC
chr12	38226376	TTTGAGTTCATTGTAGATTC
chr17	27161333	TTTGAGTTCATTGTAGATTC
chr3	121933633	TTTGAGTTCATTGTAGATTC
chr1	192482046	TTTGAGTTCATTGTAGATTC
chr1	194016245	TTTGAGTTCATTGTAGATTC
chrY	13119809	TTTGAGTTCATTGTAGATTC
chr1	15268867	TTTGAGTTCATTGTAGATTC
chr6	89295498	TTTGAGTTCATTGTAGATTC
chr8	78055277	TTTGAGTTCATTGTAGATTC
chr11	112575521	TTTGAGTTCATTGTAGATTC
chr15	67449095	TTTGAGTTCATTGTAGATTC
chr17	11845873	TTTGAGTTCATTGTAGATTC
chr22	15215508	TTTGAGTTCATTGTAGATTC
chr7	4441164	TTTGAGTTCATTGTAGATTC
chr12	55162470	TTTGAGTTCATTGTAGATTC
chr17	33542617	TTTGAGTTCATTGTAGATTC
chr11	106388219	TTTGAGTTCATTGTAGATTC
chr7	115025966	TTTGAGTTCATTGTAGATTC
chr3	35102184	TTTGAGTTCATTGTAGATTC
chr13	60741634	TTTGAGTTCATTGTAGATTC
chr15	79648143	TTTGAGTTCATTGTAGATTC
chr3	154217406	TTTGAGTTCATTGTAGATTC
chr15	51418088	TTTGAGTTCATTGTAGATTC
chr3	135677225	TTTGAGTTCATTGTAGATTC
chr8	127541838	TTTGAGTTCATTGTAGATTC
chr2	213675256	TTTGAGTTCATTGTAGATTC
chrX	51513190	TTTGAGTTCATTGTAGATTC
chrY	5607041	TTTGAGTTCATTGTAGATTC
chrX	106852286	TTTGAGTTCATTGTAGATTC
chr4	102205799	TTTGAGTTCATTGTAGATTC
chr7	56507291	TTTGAGTTCATTGTAGATTC
chr8	35600670	TTTGAGTTCATTGTAGATTC
chr3	97599137	TTTGAGTTCATTGTAGATTC
chr10	37045404	TTTGAGTTCATTGTAGATTC
chr9	105777924	TTTGAGTTCATTGTAGATTC
chr6	60804359	TTTGAGTTCATTGTAGATTC
chr11	28234676	TTTGAGTTCATTGTAGATTC
chr1	196781673	TTTGAGTTCATTGTAGATTC
chr1	118735756	TTTGAGTTCATTGTAGATTC
chr12	60777629	TTTGAGTTCATTGTAGATTC
chrX	86114190	TTTGAGTTCATTGTAGATTC
chr1	115626601	TTTGAGTTCATTGTAGATTC
chr22	12319619	TTTGAGTTCATTGTAGATTC
chr1	246409047	TTTGAGTTCATTGTAGATTC
chr19	30185526	TTTGAGTTCATTGTAGATTC
chr1	171097662	TTTGAGTTCATTGTAGATTC
chrY	15842479	TTTGAGTTCATTGTAGATTC
chr6	29177469	TTTGAGTTCATTGTAGATTC
chr12	67844678	TTTGAGTTCATTGTAGATTC
chr3	139566233	TTTGAGTTCATTGTAGATTC
chr4	106685753	TTTGAGTTCATTGTAGATTC
chr4	114150306	TTTGAGTTCATTGTAGATTC
chr9	22566854	TTTGAGTTCATTGTAGATTC
chr4	42982926	TTTGAGTTCATTGTAGATTC
chr1	46808516	TTTGAGTTCATTGTAGATTC
chr11	48528791	TTTGAGTTCATTGTAGATTC
chr1	5182797	TTTGAGTTCATTGTAGATTC
chr1	187332563	TTTGAGTTCATTGTAGATTC
chr7	16378978	TTTGAGTTCATTGTAGATTC
chr6	68601219	TTTGAGTTCATTGTAGATTC
chr14	59909666	TTTGAGTTCATTGTAGATTC
chr16	71603695	TTTGAGTTCATTGTAGATTC
chr5	169508496	TTTGAGTTCATTGTAGATTC
chr15	67672532	TTTGAGTTCATTGTAGATTC
chr5	90924503	TTTGAGTTCATTGTAGATTC
chrX	85729400	TTTGAGTTCATTGTAGATTC
chr13	57356528	TTTGAGTTCATTGTAGATTC
chr11	127287973	TTTGAGTTCATTGTAGATTC
chr8	5461715	TTTGAGTTCATTGTAGATTC
chr8	72347554	TTTGAGTTCATTGTAGATTC
chr4	5171178	TTTGAGTTCATTGTAGATTC
chr3	133724526	TTTGAGTTCATTGTAGATTC
chr14	25704402	TTTGAGTTCATTGTAGATTC
chr3	13990580	TTTGAGTTCATTGTAGATTC
chr4	14472065	TTTGAGTTCATTGTAGATTC
chr4	53404879	TTTGAGTTCATTGTAGATTC
chr3	87341396	TTTGAGTTCATTGTAGATTC
chr11	85952879	TTTGAGTTCATTGTAGATTC
chr9	83050413	TTTGAGTTCATTGTAGATTC
chr11	4934446	TTTGAGTTCATTGTAGATTC
chr3	111557076	TTTGAGTTCATTGTAGATTC
chr13	22522388	TTTGAGTTCATTGTAGATTC
chrX	51841306	TTTGAGTTCATTGTAGATTC
chr1	34566945	TTTGAGTTCATTGTAGATTC
chr20	21254087	TTTGAGTTCATTGTAGATTC
chrX	121691236	TTTGAGTTCATTGTAGATTC
chr1	117831876	TTTGAGTTCATTGTAGATTC
chrX	57610706	TTTGAGTTCATTGTAGATTC
chrX	76481876	TTTGAGTTCATTGTAGATTC
chrX	19941142	TTTGAGTTCATTGTAGATTC
chr18	29553223	TTTGAGTTCATTGTAGATTC
chr5	109534612	TTTGAGTTCATTGTAGATTC
chr4	72693643	TTTGAGTTCATTGTAGATTC
chr4	48052827	TTTGAGTTCATTGTAGATTC
chr2	8561946	TTTGAGTTCATTGTAGATTC
chr9	68276175	TTTGAGTTCATTGTAGATTC
chr6	77056741	TTTGAGTTCATTGTAGATTC
chr4	14661168	TTTGAGTTCATTGTAGATTC
chr18	79272106	TTTGAGTTCATTGTAGATTC
chrX	122161448	TTTGAGTTCATTGTAGATTC
chr20	54375344	TTTGAGTTCATTGTAGATTC
chr5	131133799	TTTGAGTTCATTGTAGATTC
chr3	28688038	TTTGAGTTCATTGTAGATTC
chr17	66597452	TTTGAGTTCATTGTAGATTC
chr5	86265910	TTTGAGTTCATTGTAGATTC
chr2	122265975	TTTGAGTTCATTGTAGATTC
chrX	91618748	TTTGAGTTCATTGTAGATTC
chr6	76203880	TTTGAGTTCATTGTAGATTC
chr3	88503968	TTTGAGTTCATTGTAGATTC
chr7	126826587	TTTGAGTTCATTGTAGATTC
chr9	117066877	TTTGAGTTCATTGTAGATTC
chr14	22616504	TTTGAGTTCATTGTAGATTC
chr3	163147346	TTTGAGTTCATTGTAGATTC
chrX	117828319	TTTGAGTTCATTGTAGATTC
chrX	132306653	TTTGAGTTCATTGTAGATTC
KI270706.1	8713	TTTGAGTTCATTGTAGATTC
chr11	100476589	TTTGAGTTCATTGTAGATTC
chr11	48287043	TTTGAGTTCATTGTAGATTC
chrY	13560141	TTTGAGTTCATTGTAGATTC
chr8	81572822	TTTGAGTTCATTGTAGATTC
chr16	59724133	TTTGAGTTCATTGTAGATTC
chr11	37428768	TTTGAGTTCATTGTAGATTC
chr13	75728496	TTTGAGTTCATTGTAGATTC
chr4	100001397	TTTGAGTTCATTGTAGATTC
chr8	69352253	TTTGAGTTCATTGTAGATTC
chr7	19639761	TTTGAGTTCATTGTAGATTC
chr4	186842231	TTTGAGTTCATTGTAGATTC
chr5	136783673	TTTGAGTTCATTGTAGATTC
chr9	63475990	TTTGAGTTCATTGTAGATTC
chr5	112426514	TTTGAGTTCATTGTAGATTC
chrX	74971057	TTTGAGTTCATTGTAGATTC
chr5	123355653	TTTGAGTTCATTGTAGATTC
chr4	133491778	TTTGAGTTCATTGTAGATTC
chr2	1506755	TTTGAGTTCATTGTAGATTC
chr16	59278905	TTTGAGTTCATTGTAGATTC
chr8	34587920	TTTGAGTTCATTGTAGATTC
chr10	129733430	TTTGAGTTCATTGTAGATTC
chr3	6485782	TTTGAGTTCATTGTAGATTC
chr12	77174258	TTTGAGTTCATTGTAGATTC
chr5	136410963	TTTGAGTTCATTGTAGATTC
chr11	96678649	TTTGAGTTCATTGTAGATTC
chr5	111419314	TTTGAGTTCATTGTAGATTC
chr10	95016145	TTTGAGTTCATTGTAGATTC
chr5	170214382	TTTGAGTTCATTGTAGATTC
chr11	24958624	TTTGAGTTCATTGTAGATTC
chr21	39492988	TTTGAGTTCATTGTAGATTC
chr4	163574184	TTTGAGTTCATTGTAGATTC
chr8	39670186	TTTGAGTTCATTGTAGATTC
chr1	58771050	TTTGAGTTCATTGTAGATTC
chr3	15392367	TTTGAGTTCATTGTAGATTC
chrX	100501796	TTTGAGTTCATTGTAGATTC
chr5	126891159	TTTGAGTTCATTGTAGATTC
chr6	23817350	TTTGAGTTCATTGTAGATTC
chrX	7452370	TTTGAGTTCATTGTAGATTC
chr11	22696814	TTTGAGTTCATTGTAGATTC
chr12	17559973	TTTGAGTTCATTGTAGATTC
chr7	51603276	TTTGAGTTCATTGTAGATTC
chr5	90663483	TTTGAGTTCATTGTAGATTC
chr3	192961176	TTTGAGTTCATTGTAGATTC
chr6	141205441	TTTGAGTTCATTGTAGATTC
chr18	50328976	TTTGAGTTCATTGTAGATTC
chrX	148972645	TTTGAGTTCATTGTAGATTC
chrX	6584887	TTTGAGTTCATTGTAGATTC
chr14	85212310	TTTGAGTTCATTGTAGATTC
chr1	60379676	TTTGAGTTCATTGTAGATTC
chr6	74027698	TTTGAGTTCATTGTAGATTC
chr1	248167431	TTTGAGTTCATTGTAGATTC
chr9	108068401	TTTGAGTTCATTGTAGATTC
chr6	114971255	TTTGAGTTCATTGTAGATTC
chr18	59404812	TTTGAGTTCATTGTAGATTC
chr12	42044360	TTTGAGTTCATTGTAGATTC
chr7	137210685	TTTGAGTTCATTGTAGATTC
chr13	95735692	TTTGAGTTCATTGTAGATTC
chr12	97350279	TTTGAGTTCATTGTAGATTC
chr8	72930668	TTTGAGTTCATTGTAGATTC
chr12	44023696	TTTGAGTTCATTGTAGATTC
chr9	4915941	TTTGAGTTCATTGTAGATTC
chr8	51391609	TTTGAGTTCATTGTAGATTC
chr12	22821173	TTTGAGTTCATTGTAGATTC
chrX	64516287	TTTGAGTTCATTGTAGATTC
chr19	23430999	TTTGAGTTCATTGTAGATTC
chr10	83239006	TTTGAGTTCATTGTAGATTC
chr4	107207541	TTTGAGTTCATTGTAGATTC
chr15	31912496	TTTGAGTTCATTGTAGATTC
chrX	132865850	TTTGAGTTCATTGTAGATTC
chr12	89154673	TTTGAGTTCATTGTAGATTC
chr4	43692328	TTTGAGTTCATTGTAGATTC
chr5	73469328	TTTGAGTTCATTGTAGATTC
chr3	133000387	TTTGAGTTCATTGTAGATTC
chr6	38129195	TTTGAGTTCATTGTAGATTC
chr11	99963029	TTTGAGTTCATTGTAGATTC
chr10	119798	TTTGAGTTCATTGTAGATTC
chr9	2893877	TTTGAGTTCATTGTAGATTC
chr5	70744585	TTTGAGTTCATTGTAGATTC
chr14	79127046	TTTGAGTTCATTGTAGATTC
chr17	27129352	TTTGAGTTCATTGTAGATTC
chr2	177925600	TTTGAGTTCATTGTAGATTC
chrX	36204121	TTTGAGTTCATTGTAGATTC
chr3	137634580	TTTGAGTTCATTGTAGATTC
chr4	90490393	TTTGAGTTCATTGTAGATTC
chr17	5850425	TTTGAGTTCATTGTAGATTC
chr11	23299036	TTTGAGTTCATTGTAGATTC
chr19	37049587	TTTGAGTTCATTGTAGATTC
chr12	97705620	TTTGAGTTCATTGTAGATTC
chr3	81797133	TTTGAGTTCATTGTAGATTC
chr3	173254753	TTTGAGTTCATTGTAGATTC
chr4	103263715	TTTGAGTTCATTGTAGATTC
chr5	43911345	TTTGAGTTCATTGTAGATTC
chr4	91022881	TTTGAGTTCATTGTAGATTC
chr1	170371713	TTTGAGTTCATTGTAGATTC
chrX	54971208	TTTGAGTTCATTGTAGATTC
chr5	68008674	TTTGAGTTCATTGTAGATTC
chr16	14994010	TTTGAGTTCATTGTAGATTC
chr6	93223887	TTTGAGTTCATTGTAGATTC
chrX	141825356	TTTGAGTTCATTGTAGATTC
chr4	43185924	TTTGAGTTCATTGTAGATTC
chr6	86843384	TTTGAGTTCATTGTAGATTC
chr5	145448343	TTTGAGTTCATTGTAGATTC
chr5	30424243	TTTGAGTTCATTGTAGATTC
chr7	150494185	TTTGAGTTCATTGTAGATTC
chr1	113634107	TTTGAGTTCATTGTAGATTC
chr18	37096945	TTTGAGTTCATTGTAGATTC
chrX	138530170	TTTGAGTTCATTGTAGATTC
chr12	61400483	TTTGAGTTCATTGTAGATTC
chr10	45010045	TTTGAGTTCATTGTAGATTC
chr11	110550711	TTTGAGTTCATTGTAGATTC
chr5	18260047	TTTGAGTTCATTGTAGATTC
chr7	123427723	TTTGAGTTCATTGTAGATTC
chr21	16151350	TTTGAGTTCATTGTAGATTC
chr6	6442430	TTTGAGTTCATTGTAGATTC
chr9	71197742	TTTGAGTTCATTGTAGATTC
chr2	38133283	TTTGAGTTCATTGTAGATTC
chr5	111327881	TTTGAGTTCATTGTAGATTC
chrX	102811837	TTTGAGTTCATTGTAGATTC
chr1	79512130	TTTGAGTTCATTGTAGATTC
chr9	78737604	TTTGAGTTCATTGTAGATTC
chr10	116053266	TTTGAGTTCATTGTAGATTC
chr9	85072536	TTTGAGTTCATTGTAGATTC
chr9	22015966	TTTGAGTTCATTGTAGATTC
chr19	8717018	TTTGAGTTCATTGTAGATTC
chr1	219775752	TTTGAGTTCATTGTAGATTC
chr3	109509072	TTTGAGTTCATTGTAGATTC
chr16	59681321	TTTGAGTTCATTGTAGATTC
chr2	5050641	TTTGAGTTCATTGTAGATTC
chr20	30141706	TTTGAGTTCATTGTAGATTC
chr8	118700211	TTTGAGTTCATTGTAGATTC
chr2	102567227	TTTGAGTTCATTGTAGATTC
chrX	106190415	TTTGAGTTCATTGTAGATTC
chr7	45378367	TTTGAGTTCATTGTAGATTC
chr18	10573541	TTTGAGTTCATTGTAGATTC
chr8	114653901	TTTGAGTTCATTGTAGATTC
chr8	98584966	TTTGAGTTCATTGTAGATTC
chr20	11116968	TTTGAGTTCATTGTAGATTC
chr8	119160266	TTTGAGTTCATTGTAGATTC
chr14	39928948	TTTGAGTTCATTGTAGATTC
chr1	196220243	TTTGAGTTCATTGTAGATTC
chr3	97542966	TTTGAGTTCATTGTAGATTC
chr4	68510677	TTTGAGTTCATTGTAGATTC
chr17	3148239	TTTGAGTTCATTGTAGATTC
chr2	192269298	TTTGAGTTCATTGTAGATTC
chrX	3557814	TTTGAGTTCATTGTAGATTC
chr14	36120083	TTTGAGTTCATTGTAGATTC
chr4	97679497	TTTGAGTTCATTGTAGATTC
chrX	78803249	TTTGAGTTCATTGTAGATTC
chr4	148318747	TTTGAGTTCATTGTAGATTC
chr18	36236002	TTTGAGTTCATTGTAGATTC
chr12	60003931	TTTGAGTTCATTGTAGATTC
chr6	85927464	TTTGAGTTCATTGTAGATTC
chr1	144575373	TTTGAGTTCATTGTAGATTC
chr4	77487863	TTTGAGTTCATTGTAGATTC
chr2	187660566	TTTGAGTTCATTGTAGATTC
chr12	72907996	TTTGAGTTCATTGTAGATTC
chr15	37285036	TTTGAGTTCATTGTAGATTC
chr2	139533688	TTTGAGTTCATTGTAGATTC
chr15	89044775	TTTGAGTTCATTGTAGATTC
chr10	122807544	TTTGAGTTCATTGTAGATTC
chr7	109650296	TTTGAGTTCATTGTAGATTC
chr8	53781412	TTTGAGTTCATTGTAGATTC
chr7	13085628	TTTGAGTTCATTGTAGATTC
chr5	64256071	TTTGAGTTCATTGTAGATTC
chr1	48461209	TTTGAGTTCATTGTAGATTC
chr6	99926707	TTTGAGTTCATTGTAGATTC
chr4	124612805	TTTGAGTTCATTGTAGATTC
chr11	110383655	TTTGAGTTCATTGTAGATTC
chr8	99426784	TTTGAGTTCATTGTAGATTC
chr8	121519236	TTTGAGTTCATTGTAGATTC
chr2	156529309	TTTGAGTTCATTGTAGATTC
chr11	15270738	TTTGAGTTCATTGTAGATTC
chr5	113854110	TTTGAGTTCATTGTAGATTC
chr12	58472276	TTTGAGTTCATTGTAGATTC
chrX	85789619	TTTGAGTTCATTGTAGATTC
chr5	155059739	TTTGAGTTCATTGTAGATTC
chr1	165971737	TTTGAGTTCATTGTAGATTC
chr9	17263914	TTTGAGTTCATTGTAGATTC
chr6	142423036	TTTGAGTTCATTGTAGATTC
chr7	89016208	TTTGAGTTCATTGTAGATTC
chrY	11268870	TTTGAGTTCATTGTAGATTC
chrX	62902148	TTTGAGTTCATTGTAGATTC
chr13	22533651	TTTGAGTTCATTGTAGATTC
chr8	69037013	TTTGAGTTCATTGTAGATTC
chrX	51992174	TTTGAGTTCATTGTAGATTC
chr16	16841409	TTTGAGTTCATTGTAGATTC
KI270727.1	295065	TTTGAGTTCATTGTAGATTC
chr7	119214968	TTTGAGTTCATTGTAGATTC
chr2	70430101	TTTGAGTTCATTGTAGATTC
chr6	52772100	TTTGAGTTCATTGTAGATTC
chr10	15665387	TTTGAGTTCATTGTAGATTC
chr2	108801499	TTTGAGTTCATTGTAGATTC
chr20	8595972	TTTGAGTTCATTGTAGATTC
chr11	48542776	TTTGAGTTCATTGTAGATTC
chr3	36169008	TTTGAGTTCATTGTAGATTC
chr3	13968379	TTTGAGTTCATTGTAGATTC
chr18	69252145	TTTGAGTTCATTGTAGATTC
chr16	16576120	TTTGAGTTCATTGTAGATTC
chr3	135933131	TTTGAGTTCATTGTAGATTC
chr5	21375540	TTTGAGTTCATTGTAGATTC
chr4	61972028	TTTGAGTTCATTGTAGATTC
chr7	49681143	TTTGAGTTCATTGTAGATTC
chr17	42265079	TTTGAGTTCATTGTAGATTC
chr8	48334813	TTTGAGTTCATTGTAGATTC
chr6	82390289	TTTGAGTTCATTGTAGATTC
chr15	44076036	TTTGAGTTCATTGTAGATTC
chr12	43623322	TTTGAGTTCATTGTAGATTC
chr3	84231114	TTTGAGTTCATTGTAGATTC
chr4	167277008	TTTGAGTTCATTGTAGATTC
chr13	73453855	TTTGAGTTCATTGTAGATTC
chr1	213113430	TTTGAGTTCATTGTAGATTC
chr2	115330305	TTTGAGTTCATTGTAGATTC
chr9	94470055	TTTGAGTTCATTGTAGATTC
chr7	104587987	TTTGAGTTCATTGTAGATTC
chr12	81241707	TTTGAGTTCATTGTAGATTC
chr6	101186987	TTTGAGTTCATTGTAGATTC
chr10	67672230	TTTGAGTTCATTGTAGATTC
chrX	11573056	TTTGAGTTCATTGTAGATTC
chr10	108794510	TTTGAGTTCATTGTAGATTC
chr11	48612625	TTTGAGTTCATTGTAGATTC
chrX	56370686	TTTGAGTTCATTGTAGATTC
chr3	26385608	TTTGAGTTCATTGTAGATTC
chr5	55588401	TTTGAGTTCATTGTAGATTC
chr3	15908111	TTTGAGTTCATTGTAGATTC
chr1	68996490	TTTGAGTTCATTGTAGATTC
chr5	90687082	TTTGAGTTCATTGTAGATTC
chrX	143763168	TTTGAGTTCATTGTAGATTC
chr8	107058819	TTTGAGTTCATTGTAGATTC
chr3	100473245	TTTGAGTTCATTGTAGATTC
chr3	69476074	TTTGAGTTCATTGTAGATTC
chr4	101406536	TTTGAGTTCATTGTAGATTC
chr19	40038782	TTTGAGTTCATTGTAGATTC
chr8	50213800	TTTGAGTTCATTGTAGATTC
chr5	90620468	TTTGAGTTCATTGTAGATTC
chr4	27229752	TTTGAGTTCATTGTAGATTC
chr4	104687757	TTTGAGTTCATTGTAGATTC
chr4	148766272	TTTGAGTTCATTGTAGATTC
chr3	154434452	TTTGAGTTCATTGTAGATTC
chr18	65780175	TTTGAGTTCATTGTAGATTC
chr11	115857514	TTTGAGTTCATTGTAGATTC
chr3	165317643	TTTGAGTTCATTGTAGATTC
chr11	58261879	TTTGAGTTCATTGTAGATTC
chr8	106488294	TTTGAGTTCATTGTAGATTC
chr20	12443992	TTTGAGTTCATTGTAGATTC
chr15	30158092	TTTGAGTTCATTGTAGATTC
chr1	97584281	TTTGAGTTCATTGTAGATTC
chr16	35226296	TTTGAGTTCATTGTAGATTC
chr4	76829106	TTTGAGTTCATTGTAGATTC
chr8	114043088	TTTGAGTTCATTGTAGATTC
chr5	173403669	TTTGAGTTCATTGTAGATTC
chr11	74290315	TTTGAGTTCATTGTAGATTC
chr3	76453046	TTTGAGTTCATTGTAGATTC
chr18	64227253	TTTGAGTTCATTGTAGATTC
chr21	16614338	TTTGAGTTCATTGTAGATTC
chr1	152432083	TTTGAGTTCATTGTAGATTC
chr12	97652001	TTTGAGTTCATTGTAGATTC
chr2	76133368	TTTGAGTTCATTGTAGATTC
chrX	107986948	TTTGAGTTCATTGTAGATTC
chr4	113490013	TTTGAGTTCATTGTAGATTC
chr4	35325557	TTTGAGTTCATTGTAGATTC
chr7	108938405	TTTGAGTTCATTGTAGATTC
chrY	11755797	TTTGAGTTCATTGTAGATTC
chr1	104771119	TTTGAGTTCATTGTAGATTC
chr3	154201875	TTTGAGTTCATTGTAGATTC
chr17	37379529	TTTGAGTTCATTGTAGATTC
chr4	124392341	TTTGAGTTCATTGTAGATTC
chr5	44576931	TTTGAGTTCATTGTAGATTC
chrY	13777726	TTTGAGTTCATTGTAGATTC
chr11	55620005	TTTGAGTTCATTGTAGATTC
chr17	70545684	TTTGAGTTCATTGTAGATTC
chr2	155444705	TTTGAGTTCATTGTAGATTC
chr9	40676589	TTTGAGTTCATTGTAGATTC
chr13	19612618	TTTGAGTTCATTGTAGATTC
chr22	15932172	TTTGAGTTCATTGTAGATTC
chr2	56661175	TTTGAGTTCATTGTAGATTC
chr5	50268205	TTTGAGTTCATTGTAGATTC
chr3	19371481	TTTGAGTTCATTGTAGATTC
chr7	14416142	TTTGAGTTCATTGTAGATTC
chr5	41534789	TTTGAGTTCATTGTAGATTC
chr5	46424158	TTTGAGTTCATTGTAGATTC
chr3	11485412	TTTGAGTTCATTGTAGATTC
chr2	234755574	TTTGAGTTCATTGTAGATTC
chrX	14458743	TTTGAGTTCATTGTAGATTC
chr5	113978339	TTTGAGTTCATTGTAGATTC
chr13	49014469	TTTGAGTTCATTGTAGATTC
chr8	63616331	TTTGAGTTCATTGTAGATTC
chr20	42615808	TTTGAGTTCATTGTAGATTC
chr18	46923946	TTTGAGTTCATTGTAGATTC
chr13	93364006	TTTGAGTTCATTGTAGATTC
chr3	179127591	TTTGAGTTCATTGTAGATTC
chr6	135510308	TTTGAGTTCATTGTAGATTC
chr5	120310997	TTTGAGTTCATTGTAGATTC
chrX	99594857	TTTGAGTTCATTGTAGATTC
chr6	101789077	TTTGAGTTCATTGTAGATTC
chr16	64395687	TTTGAGTTCATTGTAGATTC
chr2	186396620	TTTGAGTTCATTGTAGATTC
chr14	40266173	TTTGAGTTCATTGTAGATTC
chr1	74337221	TTTGAGTTCATTGTAGATTC
chr5	85063908	TTTGAGTTCATTGTAGATTC
chr9	110340043	TTTGAGTTCATTGTAGATTC
chr3	148430287	TTTGAGTTCATTGTAGATTC
chr1	174674959	TTTGAGTTCATTGTAGATTC
chr17	3348116	TTTGAGTTCATTGTAGATTC
chr9	134587707	TTTGAGTTCATTGTAGATTC
chr4	58778585	TTTGAGTTCATTGTAGATTC
chr19	12005679	TTTGAGTTCATTGTAGATTC
chr6	23359850	TTTGAGTTCATTGTAGATTC
chr8	96473109	TTTGAGTTCATTGTAGATTC
chr16	9585363	TTTGAGTTCATTGTAGATTC
chr1	147191555	TTTGAGTTCATTGTAGATTC
chr4	127063432	TTTGAGTTCATTGTAGATTC
chr3	191043030	TTTGAGTTCATTGTAGATTC
chr1	174591222	TTTGAGTTCATTGTAGATTC
chr2	179062054	TTTGAGTTCATTGTAGATTC
chr6	32410148	TTTGAGTTCATTGTAGATTC
chr8	87322675	TTTGAGTTCATTGTAGATTC
chr12	51563502	TTTGAGTTCATTGTAGATTC
chr20	14462405	TTTGAGTTCATTGTAGATTC
chr15	83451677	TTTGAGTTCATTGTAGATTC
chr1	105787254	TTTGAGTTCATTGTAGATTC
chr11	48653644	TTTGAGTTCATTGTAGATTC
chr1	207548991	TTTGAGTTCATTGTAGATTC
chr2	76346037	TTTGAGTTCATTGTAGATTC
chr5	67723001	TTTGAGTTCATTGTAGATTC
chr1	96241642	TTTGAGTTCATTGTAGATTC
chr8	74943521	TTTGAGTTCATTGTAGATTC
chr12	28752862	TTTGAGTTCATTGTAGATTC
chr14	79538163	TTTGAGTTCATTGTAGATTC
chr2	228229897	TTTGAGTTCATTGTAGATTC
chr8	77916786	TTTGAGTTCATTGTAGATTC
chr5	120281183	TTTGAGTTCATTGTAGATTC
chr4	114168908	TTTGAGTTCATTGTAGATTC
chr20	8533735	TTTGAGTTCATTGTAGATTC
chr5	78940152	TTTGAGTTCATTGTAGATTC
chr4	53214523	TTTGAGTTCATTGTAGATTC
chrX	64297452	TTTGAGTTCATTGTAGATTC
chrX	26490634	TTTGAGTTCATTGTAGATTC
chr5	122911340	TTTGAGTTCATTGTAGATTC
chr5	45743942	TTTGAGTTCATTGTAGATTC
chr4	116425983	TTTGAGTTCATTGTAGATTC
chrX	79766468	TTTGAGTTCATTGTAGATTC
chr5	103309975	TTTGAGTTCATTGTAGATTC
chr2	154989539	TTTGAGTTCATTGTAGATTC
chrX	27109859	TTTGAGTTCATTGTAGATTC
chr5	33096769	TTTGAGTTCATTGTAGATTC
GL000219.1	112063	TTTGAGTTCATTGTAGATTC
chr7	89462636	TTTGAGTTCATTGTAGATTC
chr8	105361343	TTTGAGTTCATTGTAGATTC
chr12	58993364	TTTGAGTTCATTGTAGATTC
chr2	134210061	TTTGAGTTCATTGTAGATTC
chr3	16954897	TTTGAGTTCATTGTAGATTC
chr12	79040494	TTTGAGTTCATTGTAGATTC
chr14	46969621	TTTGAGTTCATTGTAGATTC
chrX	21233701	TTTGAGTTCATTGTAGATTC
chr9	69435662	TTTGAGTTCATTGTAGATTC
chr10	85517787	TTTGAGTTCATTGTAGATTC
chr9	79495421	TTTGAGTTCATTGTAGATTC
chr2	118996210	TTTGAGTTCATTGTAGATTC
chrX	83098811	TTTGAGTTCATTGTAGATTC
chr1	184800236	TTTGAGTTCATTGTAGATTC
chr2	144898470	TTTGAGTTCATTGTAGATTC
chr2	222150474	TTTGAGTTCATTGTAGATTC
chr5	45494471	TTTGAGTTCATTGTAGATTC
chr18	71656509	TTTGAGTTCATTGTAGATTC
chr2	12492399	TTTGAGTTCATTGTAGATTC
chr9	111080347	TTTGAGTTCATTGTAGATTC
chr11	98342994	TTTGAGTTCATTGTAGATTC
chr10	64836249	TTTGAGTTCATTGTAGATTC
chr2	199560939	TTTGAGTTCATTGTAGATTC
chr9	40467178	TTTGAGTTCATTGTAGATTC
chr2	217674991	TTTGAGTTCATTGTAGATTC
chr7	116719360	TTTGAGTTCATTGTAGATTC
chrX	91511079	TTTGAGTTCATTGTAGATTC
chr3	93748691	TTTGAGTTCATTGTAGATTC
chr3	77986009	TTTGAGTTCATTGTAGATTC
chr4	65053033	TTTGAGTTCATTGTAGATTC
chr12	25465692	TTTGAGTTCATTGTAGATTC
chr8	118216332	TTTGAGTTCATTGTAGATTC
chr7	115280749	TTTGAGTTCATTGTAGATTC
chr6	71827583	TTTGAGTTCATTGTAGATTC
chr1	177672685	TTTGAGTTCATTGTAGATTC
chr18	40729439	TTTGAGTTCATTGTAGATTC
chr10	19089458	TTTGAGTTCATTGTAGATTC
chr2	213568104	TTTGAGTTCATTGTAGATTC
chr2	98594991	TTTGAGTTCATTGTAGATTC
chrX	112174950	TTTGAGTTCATTGTAGATTC
chrX	90843659	TTTGAGTTCATTGTAGATTC
chr13	57962184	TTTGAGTTCATTGTAGATTC
chr3	186006130	TTTGAGTTCATTGTAGATTC
chrX	104731089	TTTGAGTTCATTGTAGATTC
chr5	135983387	TTTGAGTTCATTGTAGATTC
chr1	193385669	TTTGAGTTCATTGTAGATTC
chr4	131677402	TTTGAGTTCATTGTAGATTC
chr8	79273318	TTTGAGTTCATTGTAGATTC
chr11	130942164	TTTGAGTTCATTGTAGATTC
chr4	143786558	TTTGAGTTCATTGTAGATTC
chr16	6223572	TTTGAGTTCATTGTAGATTC
chr3	1811847	TTTGAGTTCATTGTAGATTC
chr8	46516187	TTTGAGTTCATTGTAGATTC
chrY	13179958	TTTGAGTTCATTGTAGATTC
chrX	80152172	TTTGAGTTCATTGTAGATTC
chr8	119474738	TTTGAGTTCATTGTAGATTC
chr8	106038800	TTTGAGTTCATTGTAGATTC
chr13	78514078	TTTGAGTTCATTGTAGATTC
chrX	116047776	TTTGAGTTCATTGTAGATTC
chr7	114491377	TTTGAGTTCATTGTAGATTC
chr3	133154160	TTTGAGTTCATTGTAGATTC
chr3	70792256	TTTGAGTTCATTGTAGATTC
chr6	84365429	TTTGAGTTCATTGTAGATTC
chr4	122165944	TTTGAGTTCATTGTAGATTC
chr11	45010164	TTTGAGTTCATTGTAGATTC
chr9	22701457	TTTGAGTTCATTGTAGATTC
chrX	67151792	TTTGAGTTCATTGTAGATTC
chr10	94825528	TTTGAGTTCATTGTAGATTC
chr2	180586492	TTTGAGTTCATTGTAGATTC
chr5	27046916	TTTGAGTTCATTGTAGATTC
chr5	152914546	TTTGAGTTCATTGTAGATTC
chr6	125034066	TTTGAGTTCATTGTAGATTC
chr7	111121227	TTTGAGTTCATTGTAGATTC
chr17	22728055	TTTGAGTTCATTGTAGATTC
chr10	5175848	TTTGAGTTCATTGTAGATTC
chr3	177389643	TTTGAGTTCATTGTAGATTC
chr13	33887506	TTTGAGTTCATTGTAGATTC
chr15	71793895	TTTGAGTTCATTGTAGATTC
chr13	81064963	TTTGAGTTCATTGTAGATTC
chr3	173498925	TTTGAGTTCATTGTAGATTC
chr18	8574085	TTTGAGTTCATTGTAGATTC
chrX	97510380	TTTGAGTTCATTGTAGATTC
chr8	136890501	TTTGAGTTCATTGTAGATTC
KI270710.1	19199	TTTGAGTTCATTGTAGATTC
chr2	179156693	TTTGAGTTCATTGTAGATTC
chr7	44198633	TTTGAGTTCATTGTAGATTC
chr11	56587536	TTTGAGTTCATTGTAGATTC
chr11	90578336	TTTGAGTTCATTGTAGATTC
chr3	161749387	TTTGAGTTCATTGTAGATTC
chr7	145780787	TTTGAGTTCATTGTAGATTC
chr3	111240519	TTTGAGTTCATTGTAGATTC
chr11	40586345	TTTGAGTTCATTGTAGATTC
chr12	69798395	TTTGAGTTCATTGTAGATTC
chr1	143558971	TTTGAGTTCATTGTAGATTC
chr13	52270513	TTTGAGTTCATTGTAGATTC
chr5	70756995	TTTGAGTTCATTGTAGATTC
chr4	117656355	TTTGAGTTCATTGTAGATTC
chr4	54969543	TTTGAGTTCATTGTAGATTC
chr8	104740720	TTTGAGTTCATTGTAGATTC
chrY	9590599	TTTGAGTTCATTGTAGATTC
chr5	122378411	TTTGAGTTCATTGTAGATTC
chr4	82298403	TTTGAGTTCATTGTAGATTC
chr14	24584682	TTTGAGTTCATTGTAGATTC
chr2	204767871	TTTGAGTTCATTGTAGATTC
chr7	86457905	TTTGAGTTCATTGTAGATTC
chr1	80940106	TTTGAGTTCATTGTAGATTC
chr11	109948031	TTTGAGTTCATTGTAGATTC
chr2	35182808	TTTGAGTTCATTGTAGATTC
chr2	126178920	TTTGAGTTCATTGTAGATTC
chr16	47645084	TTTGAGTTCATTGTAGATTC
chr8	121508889	TTTGAGTTCATTGTAGATTC
chr12	58110155	TTTGAGTTCATTGTAGATTC
chr6	126594698	TTTGAGTTCATTGTAGATTC
chr1	48095447	TTTGAGTTCATTGTAGATTC
chr1	60465417	TTTGAGTTCATTGTAGATTC
chrX	85752591	TTTGAGTTCATTGTAGATTC
chr2	49008898	TTTGAGTTCATTGTAGATTC
chr15	31940140	TTTGAGTTCATTGTAGATTC
chr13	82499931	TTTGAGTTCATTGTAGATTC
chr15	49205602	TTTGAGTTCATTGTAGATTC
chr2	67190680	TTTGAGTTCATTGTAGATTC
chrX	152233179	TTTGAGTTCATTGTAGATTC
chr1	66104810	TTTGAGTTCATTGTAGATTC
chrX	130568540	TTTGAGTTCATTGTAGATTC
chr6	65257141	TTTGAGTTCATTGTAGATTC
chr3	158757786	TTTGAGTTCATTGTAGATTC
chr3	103557410	TTTGAGTTCATTGTAGATTC
chrX	155300448	TTTGAGTTCATTGTAGATTC
chr10	89764767	TTTGAGTTCATTGTAGATTC
chr19	43242924	TTTGAGTTCATTGTAGATTC
chr10	106845453	TTTGAGTTCATTGTAGATTC
chr11	49927915	TTTGAGTTCATTGTAGATTC
chr3	68476031	TTTGAGTTCATTGTAGATTC
chr20	58687841	TTTGAGTTCATTGTAGATTC
chr4	16403259	TTTGAGTTCATTGTAGATTC
chr3	82105756	TTTGAGTTCATTGTAGATTC
chr5	97767490	TTTGAGTTCATTGTAGATTC
chr1	93791523	TTTGAGTTCATTGTAGATTC
chrY	23957744	TTTGAGTTCATTGTAGATTC
chrX	143991089	TTTGAGTTCATTGTAGATTC
chr2	21493787	TTTGAGTTCATTGTAGATTC
chrX	136332877	TTTGAGTTCATTGTAGATTC
chr15	19817845	TTTGAGTTCATTGTAGATTC
chr14	62999407	TTTGAGTTCATTGTAGATTC
chrX	99287118	TTTGAGTTCATTGTAGATTC
chrX	101435510	TTTGAGTTCATTGTAGATTC
chr7	75707504	TTTGAGTTCATTGTAGATTC
chrX	10805943	TTTGAGTTCATTGTAGATTC
chr5	148021782	TTTGAGTTCATTGTAGATTC
chr4	57895608	TTTGAGTTCATTGTAGATTC
chr7	54231002	TTTGAGTTCATTGTAGATTC
chr1	248296725	TTTGAGTTCATTGTAGATTC
chr4	99348998	TTTGAGTTCATTGTAGATTC
chr11	63186415	TTTGAGTTCATTGTAGATTC
chr4	26627757	TTTGAGTTCATTGTAGATTC
chr5	45882101	TTTGAGTTCATTGTAGATTC
chr5	75770417	TTTGAGTTCATTGTAGATTC
chr4	181094416	TTTGAGTTCATTGTAGATTC
chr9	30637636	TTTGAGTTCATTGTAGATTC
chr20	24553181	TTTGAGTTCATTGTAGATTC
chr6	63194357	TTTGAGTTCATTGTAGATTC
chr11	29787953	TTTGAGTTCATTGTAGATTC
chr9	138184797	TTTGAGTTCATTGTAGATTC
chr4	41400902	TTTGAGTTCATTGTAGATTC
chr3	90188522	TTTGAGTTCATTGTAGATTC
chrX	78403923	TTTGAGTTCATTGTAGATTC
chr4	77338942	TTTGAGTTCATTGTAGATTC
chr9	120068609	TTTGAGTTCATTGTAGATTC
chr3	46783979	TTTGAGTTCATTGTAGATTC
chr1	75107731	TTTGAGTTCATTGTAGATTC
chr5	111085752	TTTGAGTTCATTGTAGATTC
chr1	99389411	TTTGAGTTCATTGTAGATTC
chr10	98783812	TTTGAGTTCATTGTAGATTC
chr15	43035498	TTTGAGTTCATTGTAGATTC
chr4	35830304	TTTGAGTTCATTGTAGATTC
chr11	87630716	TTTGAGTTCATTGTAGATTC
chr9	103161996	TTTGAGTTCATTGTAGATTC
chr1	96141483	TTTGAGTTCATTGTAGATTC
chr15	83329605	TTTGAGTTCATTGTAGATTC
chrX	104631710	TTTGAGTTCATTGTAGATTC
chr19	15805093	TTTGAGTTCATTGTAGATTC
chr1	168660435	TTTGAGTTCATTGTAGATTC
chr4	173603929	TTTGAGTTCATTGTAGATTC
chr7	103872934	TTTGAGTTCATTGTAGATTC
chr14	40174529	TTTGAGTTCATTGTAGATTC
chr16	48016338	TTTGAGTTCATTGTAGATTC
chr5	42477754	TTTGAGTTCATTGTAGATTC
chr2	34557278	TTTGAGTTCATTGTAGATTC
chrX	76113241	TTTGAGTTCATTGTAGATTC
chrX	79986104	TTTGAGTTCATTGTAGATTC
chr4	183277848	TTTGAGTTCATTGTAGATTC
chrX	142286439	TTTGAGTTCATTGTAGATTC
chr6	6141802	TTTGAGTTCATTGTAGATTC
chrX	121264665	TTTGAGTTCATTGTAGATTC
chr1	100259204	TTTGAGTTCATTGTAGATTC
chr4	113939792	TTTGAGTTCATTGTAGATTC
chr4	103251138	TTTGAGTTCATTGTAGATTC
chr3	139144451	TTTGAGTTCATTGTAGATTC
chr4	27376561	TTTGAGTTCATTGTAGATTC
chr1	207530436	TTTGAGTTCATTGTAGATTC
chr6	79457720	TTTGAGTTCATTGTAGATTC
chr18	1517058	TTTGAGTTCATTGTAGATTC
chr3	121003423	TTTGAGTTCATTGTAGATTC
chr6	80493146	TTTGAGTTCATTGTAGATTC
chr11	74878334	TTTGAGTTCATTGTAGATTC
chrX	56048138	TTTGAGTTCATTGTAGATTC
chr7	91904550	TTTGAGTTCATTGTAGATTC
chrX	75918763	TTTGAGTTCATTGTAGATTC
chr1	83685386	TTTGAGTTCATTGTAGATTC
chr1	100663847	TTTGAGTTCATTGTAGATTC
chr11	55843236	TTTGAGTTCATTGTAGATTC
chr12	68927435	TTTGAGTTCATTGTAGATTC
chr11	99762136	TTTGAGTTCATTGTAGATTC
chr9	5240671	TTTGAGTTCATTGTAGATTC
chr12	78071425	TTTGAGTTCATTGTAGATTC
chr12	61472216	TTTGAGTTCATTGTAGATTC
chr11	32523953	TTTGAGTTCATTGTAGATTC
chr2	114333980	TTTGAGTTCATTGTAGATTC
chr5	83263716	TTTGAGTTCATTGTAGATTC
chr6	24942784	TTTGAGTTCATTGTAGATTC
chr4	122999179	TTTGAGTTCATTGTAGATTC
chr5	105514108	TTTGAGTTCATTGTAGATTC
chr14	54351701	TTTGAGTTCATTGTAGATTC
chr4	106403341	TTTGAGTTCATTGTAGATTC
chr3	80197097	TTTGAGTTCATTGTAGATTC
chr7	34266476	TTTGAGTTCATTGTAGATTC
chr2	155192139	TTTGAGTTCATTGTAGATTC
chr4	187923994	TTTGAGTTCATTGTAGATTC
chr21	13576906	TTTGAGTTCATTGTAGATTC
chrX	138301520	TTTGAGTTCATTGTAGATTC
chr21	44487628	TTTGAGTTCATTGTAGATTC
chr7	83298250	TTTGAGTTCATTGTAGATTC
chr5	131074081	TTTGAGTTCATTGTAGATTC
chr6	140688175	TTTGAGTTCATTGTAGATTC
chr7	93584930	TTTGAGTTCATTGTAGATTC
chr11	13794699	TTTGAGTTCATTGTAGATTC
chr18	32228948	TTTGAGTTCATTGTAGATTC
chr6	9966906	TTTGAGTTCATTGTAGATTC
chr11	87930436	TTTGAGTTCATTGTAGATTC
chr4	96870049	TTTGAGTTCATTGTAGATTC
chr4	97428438	TTTGAGTTCATTGTAGATTC
chr9	17912557	TTTGAGTTCATTGTAGATTC
chr9	65710225	TTTGAGTTCATTGTAGATTC
chr11	49775992	TTTGAGTTCATTGTAGATTC
chr3	143931783	TTTGAGTTCATTGTAGATTC
chr2	37420766	TTTGAGTTCATTGTAGATTC
chr3	168765322	TTTGAGTTCATTGTAGATTC
chr16	13677456	TTTGAGTTCATTGTAGATTC
chr9	108986899	TTTGAGTTCATTGTAGATTC
chr2	197688406	TTTGAGTTCATTGTAGATTC
chr8	83231364	TTTGAGTTCATTGTAGATTC
chr11	3898386	TTTGAGTTCATTGTAGATTC
chr7	87063280	TTTGAGTTCATTGTAGATTC
chr4	52320657	TTTGAGTTCATTGTAGATTC
chr7	132674270	TTTGAGTTCATTGTAGATTC
chr3	27941792	TTTGAGTTCATTGTAGATTC
chr16	13239705	TTTGAGTTCATTGTAGATTC
chr8	84972228	TTTGAGTTCATTGTAGATTC
chrX	72755734	TTTGAGTTCATTGTAGATTC
chr5	175134627	TTTGAGTTCATTGTAGATTC
chr8	10933268	TTTGAGTTCATTGTAGATTC
chr15	49797701	TTTGAGTTCATTGTAGATTC
chr5	162500715	TTTGAGTTCATTGTAGATTC
chr10	53695951	TTTGAGTTCATTGTAGATTC
chr4	11061785	TTTGAGTTCATTGTAGATTC
chr1	20832480	TTTGAGTTCATTGTAGATTC
chr6	22175726	TTTGAGTTCATTGTAGATTC
chr14	28313382	TTTGAGTTCATTGTAGATTC
chr3	34088709	TTTGAGTTCATTGTAGATTC
chr1	187804808	TTTGAGTTCATTGTAGATTC
chr5	123931013	TTTGAGTTCATTGTAGATTC
chr8	87224113	TTTGAGTTCATTGTAGATTC
chr2	86656110	TTTGAGTTCATTGTAGATTC
chr7	78668264	TTTGAGTTCATTGTAGATTC
chr4	119949599	TTTGAGTTCATTGTAGATTC
chr16	59511662	TTTGAGTTCATTGTAGATTC
chr11	48848565	TTTGAGTTCATTGTAGATTC
chr3	19289097	TTTGAGTTCATTGTAGATTC
chr13	76545940	TTTGAGTTCATTGTAGATTC
chr15	56067007	TTTGAGTTCATTGTAGATTC
chr4	73957535	TTTGAGTTCATTGTAGATTC
chr4	5778711	TTTGAGTTCATTGTAGATTC
chr16	76597464	TTTGAGTTCATTGTAGATTC
chr1	170842615	TTTGAGTTCATTGTAGATTC
chr7	119083588	TTTGAGTTCATTGTAGATTC
chr7	145413841	TTTGAGTTCATTGTAGATTC
chr16	9729717	TTTGAGTTCATTGTAGATTC
chr5	101056630	TTTGAGTTCATTGTAGATTC
chr18	31348836	TTTGAGTTCATTGTAGATTC
chr10	55683945	TTTGAGTTCATTGTAGATTC
chr17	60438053	TTTGAGTTCATTGTAGATTC
chr15	48908421	TTTGAGTTCATTGTAGATTC
chr6	47889525	TTTGAGTTCATTGTAGATTC
chrX	120047270	TTTGAGTTCATTGTAGATTC
chr5	139006324	TTTGAGTTCATTGTAGATTC
chr5	147941979	TTTGAGTTCATTGTAGATTC
chr20	12801888	TTTGAGTTCATTGTAGATTC
chr4	180494763	TTTGAGTTCATTGTAGATTC
chr5	79779785	TTTGAGTTCATTGTAGATTC
KI270757.1	63419	TTTGAGTTCATTGTAGATTC
chr4	5481455	TTTGAGTTCATTGTAGATTC
chr3	126221007	TTTGAGTTCATTGTAGATTC
chr12	82653308	TTTGAGTTCATTGTAGATTC
chr9	92450967	TTTGAGTTCATTGTAGATTC
chr9	75203501	TTTGAGTTCATTGTAGATTC
chr3	137309878	TTTGAGTTCATTGTAGATTC
chr7	119323518	TTTGAGTTCATTGTAGATTC
chr5	162477742	TTTGAGTTCATTGTAGATTC
chr1	86132236	TTTGAGTTCATTGTAGATTC
chr15	87328271	TTTGAGTTCATTGTAGATTC
chr21	17908964	TTTGAGTTCATTGTAGATTC
chr4	5242448	TTTGAGTTCATTGTAGATTC
chr14	52638839	TTTGAGTTCATTGTAGATTC
chr4	101507783	TTTGAGTTCATTGTAGATTC
chr3	18690681	TTTGAGTTCATTGTAGATTC
chr3	760824	TTTGAGTTCATTGTAGATTC
chr9	35951483	TTTGAGTTCATTGTAGATTC
chr7	37612925	TTTGAGTTCATTGTAGATTC
chr8	95578256	TTTGAGTTCATTGTAGATTC
chrX	26423115	TTTGAGTTCATTGTAGATTC
chrX	63093127	TTTGAGTTCATTGTAGATTC
chr10	1246208	TTTGAGTTCATTGTAGATTC
chr5	15907388	TTTGAGTTCATTGTAGATTC
chr6	108450470	TTTGAGTTCATTGTAGATTC
chr20	8688207	TTTGAGTTCATTGTAGATTC
chr5	131029588	TTTGAGTTCATTGTAGATTC
chr11	117567450	TTTGAGTTCATTGTAGATTC
chr6	112468109	TTTGAGTTCATTGTAGATTC
chr2	76648867	TTTGAGTTCATTGTAGATTC
chr18	39860899	TTTGAGTTCATTGTAGATTC
chr7	46065848	TTTGAGTTCATTGTAGATTC
chr7	123523574	TTTGAGTTCATTGTAGATTC
chr13	103503914	TTTGAGTTCATTGTAGATTC
chr4	141363278	TTTGAGTTCATTGTAGATTC
chr16	62489376	TTTGAGTTCATTGTAGATTC
chr5	100088475	TTTGAGTTCATTGTAGATTC
chr10	109813298	TTTGAGTTCATTGTAGATTC
chr1	194435890	TTTGAGTTCATTGTAGATTC
chr2	76481270	TTTGAGTTCATTGTAGATTC
chr1	174695070	TTTGAGTTCATTGTAGATTC
chr2	16876855	TTTGAGTTCATTGTAGATTC
chr7	41120264	TTTGAGTTCATTGTAGATTC
chr6	103758560	TTTGAGTTCATTGTAGATTC
chr18	70747422	TTTGAGTTCATTGTAGATTC
chrX	67312769	TTTGAGTTCATTGTAGATTC
chrX	31512205	TTTGAGTTCATTGTAGATTC
chr6	114846419	TTTGAGTTCATTGTAGATTC
chr13	47222470	TTTGAGTTCATTGTAGATTC
chr11	55441111	TTTGAGTTCATTGTAGATTC
chr8	113673885	TTTGAGTTCATTGTAGATTC
chr15	21567971	TTTGAGTTCATTGTAGATTC
chr6	41129435	TTTGAGTTCATTGTAGATTC
chr18	29509871	TTTGAGTTCATTGTAGATTC
chr18	1734156	TTTGAGTTCATTGTAGATTC
chr6	10985232	TTTGAGTTCATTGTAGATTC
chr13	34481135	TTTGAGTTCATTGTAGATTC
chrX	151628076	TTTGAGTTCATTGTAGATTC
chrX	101580908	TTTGAGTTCATTGTAGATTC
chrY	19988746	TTTGAGTTCATTGTAGATTC
chr6	164032944	TTTGAGTTCATTGTAGATTC
chr18	42207092	TTTGAGTTCATTGTAGATTC
chr9	115918669	TTTGAGTTCATTGTAGATTC
chr5	63519463	TTTGAGTTCATTGTAGATTC
chr10	1276379	TTTGAGTTCATTGTAGATTC
chr16	35115825	TTTGAGTTCATTGTAGATTC
chr16	47011908	TTTGAGTTCATTGTAGATTC
chr8	16633565	TTTGAGTTCATTGTAGATTC
chr4	48313477	TTTGAGTTCATTGTAGATTC
chr2	61980620	TTTGAGTTCATTGTAGATTC
chr14	19720912	TTTGAGTTCATTGTAGATTC
chr6	146323462	TTTGAGTTCATTGTAGATTC
chr2	48918627	TTTGAGTTCATTGTAGATTC
chr12	39791091	TTTGAGTTCATTGTAGATTC
chr20	4754018	TTTGAGTTCATTGTAGATTC
chrX	141703555	TTTGAGTTCATTGTAGATTC
chr14	45321111	TTTGAGTTCATTGTAGATTC
chr14	86075362	TTTGAGTTCATTGTAGATTC
chr4	164554364	TTTGAGTTCATTGTAGATTC
chr13	60800750	TTTGAGTTCATTGTAGATTC
chr11	124338036	TTTGAGTTCATTGTAGATTC
chr3	188373578	TTTGAGTTCATTGTAGATTC
chrX	17055222	TTTGAGTTCATTGTAGATTC
chr4	64019434	TTTGAGTTCATTGTAGATTC
chr15	81669352	TTTGAGTTCATTGTAGATTC
KI270749.1	146097	TTTGAGTTCATTGTAGATTC
chr14	28545275	TTTGAGTTCATTGTAGATTC
chr5	116202757	TTTGAGTTCATTGTAGATTC
chr15	97395079	TTTGAGTTCATTGTAGATTC
chr1	248118685	TTTGAGTTCATTGTAGATTC
chr4	34623116	TTTGAGTTCATTGTAGATTC
chr10	115201101	TTTGAGTTCATTGTAGATTC
chr6	68782845	TTTGAGTTCATTGTAGATTC
chr5	82110671	TTTGAGTTCATTGTAGATTC
chrX	64109598	TTTGAGTTCATTGTAGATTC
chr1	158268018	TTTGAGTTCATTGTAGATTC
chr2	137484892	TTTGAGTTCATTGTAGATTC
chr5	104075229	TTTGAGTTCATTGTAGATTC
chr8	11402934	TTTGAGTTCATTGTAGATTC
chr12	86508930	TTTGAGTTCATTGTAGATTC
chrX	101855094	TTTGAGTTCATTGTAGATTC
chr1	177401790	TTTGAGTTCATTGTAGATTC
chr1	198310315	TTTGAGTTCATTGTAGATTC
chr12	34580686	TTTGAGTTCATTGTAGATTC
chr7	141062887	TTTGAGTTCATTGTAGATTC
chr1	112200016	TTTGAGTTCATTGTAGATTC
chr3	132372104	TTTGAGTTCATTGTAGATTC
chr8	77602662	TTTGAGTTCATTGTAGATTC
chr10	131505433	TTTGAGTTCATTGTAGATTC
chr3	120897076	TTTGAGTTCATTGTAGATTC
chr3	21181451	TTTGAGTTCATTGTAGATTC
chr18	62440204	TTTGAGTTCATTGTAGATTC
chr17	69736392	TTTGAGTTCATTGTAGATTC
chr5	28197026	TTTGAGTTCATTGTAGATTC
chr3	98378819	TTTGAGTTCATTGTAGATTC
chr19	15706527	TTTGAGTTCATTGTAGATTC
chr8	31852480	TTTGAGTTCATTGTAGATTC
chr8	33020058	TTTGAGTTCATTGTAGATTC
chr11	33441791	TTTGAGTTCATTGTAGATTC
chrX	65329420	TTTGAGTTCATTGTAGATTC
chr4	133734802	TTTGAGTTCATTGTAGATTC
chr14	87355612	TTTGAGTTCATTGTAGATTC
chr5	166775019	TTTGAGTTCATTGTAGATTC
chr20	8197530	TTTGAGTTCATTGTAGATTC
chr14	40023151	TTTGAGTTCATTGTAGATTC
chr13	50503909	TTTGAGTTCATTGTAGATTC
chr8	33897916	TTTGAGTTCATTGTAGATTC
chr1	163751103	TTTGAGTTCATTGTAGATTC
chrX	14156311	TTTGAGTTCATTGTAGATTC
chr4	74246349	TTTGAGTTCATTGTAGATTC
chrY	15153863	TTTGAGTTCATTGTAGATTC
chr3	38692945	TTTGAGTTCATTGTAGATTC
chr8	125959748	TTTGAGTTCATTGTAGATTC
chr3	22738608	TTTGAGTTCATTGTAGATTC
chrY	1704641	TTTGAGTTCATTGTAGATTC
chr11	43000234	TTTGAGTTCATTGTAGATTC
chr11	84363381	TTTGAGTTCATTGTAGATTC
chr15	69617903	TTTGAGTTCATTGTAGATTC
chrX	131379207	TTTGAGTTCATTGTAGATTC
chr12	78298775	TTTGAGTTCATTGTAGATTC
chrX	96055622	TTTGAGTTCATTGTAGATTC
chrX	67258665	TTTGAGTTCATTGTAGATTC
chr2	75082796	TTTGAGTTCATTGTAGATTC
chr13	60828068	TTTGAGTTCATTGTAGATTC
chr6	6186093	TTTGAGTTCATTGTAGATTC
chr5	161589486	TTTGAGTTCATTGTAGATTC
chr12	48278016	TTTGAGTTCATTGTAGATTC
chr10	120440643	TTTGAGTTCATTGTAGATTC
chr7	126471061	TTTGAGTTCATTGTAGATTC
chr1	205401568	TTTGAGTTCATTGTAGATTC
chr7	141770827	TTTGAGTTCATTGTAGATTC
chrY	20938671	TTTGAGTTCATTGTAGATTC
chr14	39517799	TTTGAGTTCATTGTAGATTC
chr4	148187570	TTTGAGTTCATTGTAGATTC
chr13	88192776	TTTGAGTTCATTGTAGATTC
chr12	79309887	TTTGAGTTCATTGTAGATTC
chr9	11666132	TTTGAGTTCATTGTAGATTC
chr3	16970933	TTTGAGTTCATTGTAGATTC
chr8	104627713	TTTGAGTTCATTGTAGATTC
chr14	67214036	TTTGAGTTCATTGTAGATTC
chr1	49562179	TTTGAGTTCATTGTAGATTC
chrX	141800105	TTTGAGTTCATTGTAGATTC
chrX	66181570	TTTGAGTTCATTGTAGATTC
chr2	141425791	TTTGAGTTCATTGTAGATTC
chr10	127662376	TTTGAGTTCATTGTAGATTC
chr6	44418869	TTTGAGTTCATTGTAGATTC
chr15	94148832	TTTGAGTTCATTGTAGATTC
chr12	83829914	TTTGAGTTCATTGTAGATTC
chrX	64253216	TTTGAGTTCATTGTAGATTC
chr11	43817215	TTTGAGTTCATTGTAGATTC
chr11	90400940	TTTGAGTTCATTGTAGATTC
chrY	6329326	TTTGAGTTCATTGTAGATTC
chr15	73509312	TTTGAGTTCATTGTAGATTC
chr5	97642531	TTTGAGTTCATTGTAGATTC
chr12	54738855	TTTGAGTTCATTGTAGATTC
chr4	13926000	TTTGAGTTCATTGTAGATTC
chr2	71412347	TTTGAGTTCATTGTAGATTC
chr12	33142635	TTTGAGTTCATTGTAGATTC
chr1	4875736	TTTGAGTTCATTGTAGATTC
chr9	24663703	TTTGAGTTCATTGTAGATTC
chr7	54521903	TTTGAGTTCATTGTAGATTC
chrX	80188416	TTTGAGTTCATTGTAGATTC
chr2	165040422	TTTGAGTTCATTGTAGATTC
chr4	85348643	TTTGAGTTCATTGTAGATTC
chr12	69861619	TTTGAGTTCATTGTAGATTC
chr1	162807841	TTTGAGTTCATTGTAGATTC
chr2	215124675	TTTGAGTTCATTGTAGATTC
chr20	54811725	TTTGAGTTCATTGTAGATTC
chr11	24875974	TTTGAGTTCATTGTAGATTC
chr3	158284764	TTTGAGTTCATTGTAGATTC
chr13	64503664	TTTGAGTTCATTGTAGATTC
chr5	90817284	TTTGAGTTCATTGTAGATTC
chr22	11589885	TTTGAGTTCATTGTAGATTC
chr1	2364431	TTTGAGTTCATTGTAGATTC
chr6	18967634	TTTGAGTTCATTGTAGATTC
chr12	126041075	TTTGAGTTCATTGTAGATTC
chrX	88005130	TTTGAGTTCATTGTAGATTC
chr10	81441509	TTTGAGTTCATTGTAGATTC
chr6	156355776	TTTGAGTTCATTGTAGATTC
chr3	1671753	TTTGAGTTCATTGTAGATTC
chr8	61845867	TTTGAGTTCATTGTAGATTC
chr12	10345309	TTTGAGTTCATTGTAGATTC
chr12	44109077	TTTGAGTTCATTGTAGATTC
chr7	110558397	TTTGAGTTCATTGTAGATTC
GL000220.1	64959	TTTGAGTTCATTGTAGATTC
chrX	95810718	TTTGAGTTCATTGTAGATTC
chr19	54863727	TTTGAGTTCATTGTAGATTC
chr14	44584868	TTTGAGTTCATTGTAGATTC
chr1	65545678	TTTGAGTTCATTGTAGATTC
chr19	40114424	TTTGAGTTCATTGTAGATTC
chr6	101498739	TTTGAGTTCATTGTAGATTC
chr17	27040536	TTTGAGTTCATTGTAGATTC
chr4	127432299	TTTGAGTTCATTGTAGATTC
chr6	84637243	TTTGAGTTCATTGTAGATTC
chr2	51313576	TTTGAGTTCATTGTAGATTC
chr9	34873075	TTTGAGTTCATTGTAGATTC
chr7	54306899	TTTGAGTTCATTGTAGATTC
chr3	166021970	TTTGAGTTCATTGTAGATTC
chr1	68876653	TTTGAGTTCATTGTAGATTC
chr3	4026170	TTTGAGTTCATTGTAGATTC
chr9	67748363	TTTGAGTTCATTGTAGATTC
chr7	104558550	TTTGAGTTCATTGTAGATTC
chr10	72443241	TTTGAGTTCATTGTAGATTC
chr5	171084833	TTTGAGTTCATTGTAGATTC
chr8	56328376	TTTGAGTTCATTGTAGATTC
chr4	35055678	TTTGAGTTCATTGTAGATTC
chr5	62951175	TTTGAGTTCATTGTAGATTC
chr4	58374150	TTTGAGTTCATTGTAGATTC
chr4	78259578	TTTGAGTTCATTGTAGATTC
chr3	99289468	TTTGAGTTCATTGTAGATTC
chr2	173700250	TTTGAGTTCATTGTAGATTC
chrX	69677695	TTTGAGTTCATTGTAGATTC
chr7	139903823	TTTGAGTTCATTGTAGATTC
chr5	51331652	TTTGAGTTCATTGTAGATTC
GL000224.1	111855	TTTGAGTTCATTGTAGATTC
chrX	84605164	TTTGAGTTCATTGTAGATTC
chr3	163192084	TTTGAGTTCATTGTAGATTC
chr11	49104966	TTTGAGTTCATTGTAGATTC
chrX	62658382	TTTGAGTTCATTGTAGATTC
chr1	195925863	TTTGAGTTCATTGTAGATTC
chr1	74210928	TTTGAGTTCATTGTAGATTC
chrY	18192382	TTTGAGTTCATTGTAGATTC
chrX	108451716	TTTGAGTTCATTGTAGATTC
chr12	111830032	TTTGAGTTCATTGTAGATTC
chr10	7058902	TTTGAGTTCATTGTAGATTC
chr7	31485079	TTTGAGTTCATTGTAGATTC
chr6	22163627	TTTGAGTTCATTGTAGATTC
chr17	27901538	TTTGAGTTCATTGTAGATTC
chr1	196504955	TTTGAGTTCATTGTAGATTC
chr6	124408067	TTTGAGTTCATTGTAGATTC
chr8	15556875	TTTGAGTTCATTGTAGATTC
chr2	133465880	TTTGAGTTCATTGTAGATTC
chr18	5281186	TTTGAGTTCATTGTAGATTC
chr3	118212596	TTTGAGTTCATTGTAGATTC
chr9	23723100	TTTGAGTTCATTGTAGATTC
chr13	85998958	TTTGAGTTCATTGTAGATTC
chr8	57663330	TTTGAGTTCATTGTAGATTC
chr19	42769958	TTTGAGTTCATTGTAGATTC
chr3	37636503	TTTGAGTTCATTGTAGATTC
chrX	65952221	TTTGAGTTCATTGTAGATTC
chr4	18597998	TTTGAGTTCATTGTAGATTC
chr4	11851537	TTTGAGTTCATTGTAGATTC
chr4	101739780	TTTGAGTTCATTGTAGATTC
chr2	208419394	TTTGAGTTCATTGTAGATTC
chr9	103607148	TTTGAGTTCATTGTAGATTC
chr7	66287725	TTTGAGTTCATTGTAGATTC
chrX	16597064	TTTGAGTTCATTGTAGATTC
chr7	49663559	TTTGAGTTCATTGTAGATTC
chr8	78192832	TTTGAGTTCATTGTAGATTC
chr5	120422082	TTTGAGTTCATTGTAGATTC
chr11	42430140	TTTGAGTTCATTGTAGATTC
chr10	108066971	TTTGAGTTCATTGTAGATTC
chr14	20249728	TTTGAGTTCATTGTAGATTC
chr1	242046433	TTTGAGTTCATTGTAGATTC
chrX	110817622	TTTGAGTTCATTGTAGATTC
chr4	70918561	TTTGAGTTCATTGTAGATTC
chr6	67746364	TTTGAGTTCATTGTAGATTC
chrX	109175643	TTTGAGTTCATTGTAGATTC
chr5	106694593	TTTGAGTTCATTGTAGATTC
chr5	53225077	TTTGAGTTCATTGTAGATTC
chr4	106558961	TTTGAGTTCATTGTAGATTC
chr3	70016457	TTTGAGTTCATTGTAGATTC
chr19	24111820	TTTGAGTTCATTGTAGATTC
chr5	41235948	TTTGAGTTCATTGTAGATTC
chr6	164723966	TTTGAGTTCATTGTAGATTC
chr15	24726435	TTTGAGTTCATTGTAGATTC
chr5	106148813	TTTGAGTTCATTGTAGATTC
chr6	120847034	TTTGAGTTCATTGTAGATTC
chr9	32225915	TTTGAGTTCATTGTAGATTC
chr18	2861104	TTTGAGTTCATTGTAGATTC
chr5	100438897	TTTGAGTTCATTGTAGATTC
chr7	153866520	TTTGAGTTCATTGTAGATTC
chr1	117353435	TTTGAGTTCATTGTAGATTC
chr2	119045540	TTTGAGTTCATTGTAGATTC
chr10	19603064	TTTGAGTTCATTGTAGATTC
chr8	105308719	TTTGAGTTCATTGTAGATTC
chr8	84568918	TTTGAGTTCATTGTAGATTC
chr4	59192480	TTTGAGTTCATTGTAGATTC
chrX	50297000	TTTGAGTTCATTGTAGATTC
chr12	81048739	TTTGAGTTCATTGTAGATTC
chr6	52110723	TTTGAGTTCATTGTAGATTC
chr15	43289935	TTTGAGTTCATTGTAGATTC
chr5	38170369	TTTGAGTTCATTGTAGATTC
chr12	37824246	TTTGAGTTCATTGTAGATTC
chr15	30241233	TTTGAGTTCATTGTAGATTC
chr1	65451148	TTTGAGTTCATTGTAGATTC
chr18	70686070	TTTGAGTTCATTGTAGATTC
chrX	138879023	TTTGAGTTCATTGTAGATTC
chr12	18840126	TTTGAGTTCATTGTAGATTC
chr11	112325145	TTTGAGTTCATTGTAGATTC
chr5	63600358	TTTGAGTTCATTGTAGATTC
chr4	18176170	TTTGAGTTCATTGTAGATTC
chr2	149502100	TTTGAGTTCATTGTAGATTC
chr12	107706265	TTTGAGTTCATTGTAGATTC
chr11	55477298	TTTGAGTTCATTGTAGATTC
chr12	54883752	TTTGAGTTCATTGTAGATTC
chr6	61773514	TTTGAGTTCATTGTAGATTC
chr5	122710486	TTTGAGTTCATTGTAGATTC
chr2	114749275	TTTGAGTTCATTGTAGATTC
chr9	21963007	TTTGAGTTCATTGTAGATTC
chr3	100618087	TTTGAGTTCATTGTAGATTC
chr12	87583172	TTTGAGTTCATTGTAGATTC
chr12	2204323	TTTGAGTTCATTGTAGATTC
chr10	45318434	TTTGAGTTCATTGTAGATTC
chr16	9317990	TTTGAGTTCATTGTAGATTC
chr18	64290122	TTTGAGTTCATTGTAGATTC
chr3	112161141	TTTGAGTTCATTGTAGATTC
chr19	8796714	TTTGAGTTCATTGTAGATTC
chr5	147794158	TTTGAGTTCATTGTAGATTC
chr14	80011344	TTTGAGTTCATTGTAGATTC
chr18	9166588	TTTGAGTTCATTGTAGATTC
chr18	663387	TTTGAGTTCATTGTAGATTC
chr10	53764427	TTTGAGTTCATTGTAGATTC
chr18	68785699	TTTGAGTTCATTGTAGATTC
chr12	127095472	TTTGAGTTCATTGTAGATTC
chr7	123446059	TTTGAGTTCATTGTAGATTC
chr9	31056983	TTTGAGTTCATTGTAGATTC
chr4	48443888	TTTGAGTTCATTGTAGATTC
chr15	93627984	TTTGAGTTCATTGTAGATTC
chrX	49943273	TTTGAGTTCATTGTAGATTC
chr5	123237481	TTTGAGTTCATTGTAGATTC
chr12	46705664	TTTGAGTTCATTGTAGATTC
chr20	19088732	TTTGAGTTCATTGTAGATTC
chr12	90220706	TTTGAGTTCATTGTAGATTC
chrX	11219759	TTTGAGTTCATTGTAGATTC
chr4	99423749	TTTGAGTTCATTGTAGATTC
chr4	165958582	TTTGAGTTCATTGTAGATTC
chr2	210666197	TTTGAGTTCATTGTAGATTC
chr2	194281326	TTTGAGTTCATTGTAGATTC
chr7	9722702	TTTGAGTTCATTGTAGATTC
chr4	18255422	TTTGAGTTCATTGTAGATTC
chr2	66796926	TTTGAGTTCATTGTAGATTC
chr1	62700275	TTTGAGTTCATTGTAGATTC
chrX	148617444	TTTGAGTTCATTGTAGATTC
chr7	130702869	TTTGAGTTCATTGTAGATTC
chr6	85438767	TTTGAGTTCATTGTAGATTC
KI270728.1	1086949	TTTGAGTTCATTGTAGATTC
chr2	80093876	TTTGAGTTCATTGTAGATTC
chr16	16745913	TTTGAGTTCATTGTAGATTC
chrX	75962060	TTTGAGTTCATTGTAGATTC
chr14	19503809	TTTGAGTTCATTGTAGATTC
chr10	49125732	TTTGAGTTCATTGTAGATTC
chr5	151983846	TTTGAGTTCATTGTAGATTC
chrX	63231988	TTTGAGTTCATTGTAGATTC
chr2	128826302	TTTGAGTTCATTGTAGATTC
chr4	157175763	TTTGAGTTCATTGTAGATTC
chr5	148318629	TTTGAGTTCATTGTAGATTC
chrY	7154975	TTTGAGTTCATTGTAGATTC
chr18	8711761	TTTGAGTTCATTGTAGATTC
chr14	91641107	TTTGAGTTCATTGTAGATTC
chr2	124357177	TTTGAGTTCATTGTAGATTC
chr5	106892712	TTTGAGTTCATTGTAGATTC
chr1	247955811	TTTGAGTTCATTGTAGATTC
chr2	129411926	TTTGAGTTCATTGTAGATTC
chrX	104672968	TTTGAGTTCATTGTAGATTC
chr17	12450775	TTTGAGTTCATTGTAGATTC
chr10	25516241	TTTGAGTTCATTGTAGATTC
chrX	73611891	TTTGAGTTCATTGTAGATTC
chr1	101669212	TTTGAGTTCATTGTAGATTC
chr6	110133744	TTTGAGTTCATTGTAGATTC
chr15	54476179	TTTGAGTTCATTGTAGATTC
chr9	111318602	TTTGAGTTCATTGTAGATTC
chrX	56453753	TTTGAGTTCATTGTAGATTC
chr1	191078626	TTTGAGTTCATTGTAGATTC
chr22	15203250	TTTGAGTTCATTGTAGATTC
chrX	63261948	TTTGAGTTCATTGTAGATTC
chr14	45927346	TTTGAGTTCATTGTAGATTC
chr6	77917638	TTTGAGTTCATTGTAGATTC
chr3	99059535	TTTGAGTTCATTGTAGATTC
chr3	159085788	TTTGAGTTCATTGTAGATTC
chr2	11882333	TTTGAGTTCATTGTAGATTC
chr4	170783854	TTTGAGTTCATTGTAGATTC
chr8	103784139	TTTGAGTTCATTGTAGATTC
chr1	92382641	TTTGAGTTCATTGTAGATTC
chr6	153397196	TTTGAGTTCATTGTAGATTC
chr7	29700435	TTTGAGTTCATTGTAGATTC
chr4	143446665	TTTGAGTTCATTGTAGATTC
chr2	117459973	TTTGAGTTCATTGTAGATTC
chr6	99654406	TTTGAGTTCATTGTAGATTC
chr6	46762654	TTTGAGTTCATTGTAGATTC
chr7	81443681	TTTGAGTTCATTGTAGATTC
chr1	69883485	TTTGAGTTCATTGTAGATTC
chr2	160851592	TTTGAGTTCATTGTAGATTC
chr3	6945930	TTTGAGTTCATTGTAGATTC
chr6	148160270	TTTGAGTTCATTGTAGATTC
chr13	68336517	TTTGAGTTCATTGTAGATTC
chr1	158361851	TTTGAGTTCATTGTAGATTC
chr18	37827468	TTTGAGTTCATTGTAGATTC
chr2	113472356	TTTGAGTTCATTGTAGATTC
chr11	87242723	TTTGAGTTCATTGTAGATTC
chr10	35168469	TTTGAGTTCATTGTAGATTC
chr17	56400454	TTTGAGTTCATTGTAGATTC
chr5	162691637	TTTGAGTTCATTGTAGATTC
chr14	47129963	TTTGAGTTCATTGTAGATTC
chr7	156910266	TTTGAGTTCATTGTAGATTC
chr8	95621452	TTTGAGTTCATTGTAGATTC
chr7	69375626	TTTGAGTTCATTGTAGATTC
chr9	24094284	TTTGAGTTCATTGTAGATTC
chr5	140898060	TTTGAGTTCATTGTAGATTC
chr2	115936654	TTTGAGTTCATTGTAGATTC
chr21	17684370	TTTGAGTTCATTGTAGATTC
chrX	66560771	TTTGAGTTCATTGTAGATTC
chr12	82630018	TTTGAGTTCATTGTAGATTC
chrX	86396259	TTTGAGTTCATTGTAGATTC
chr15	49260437	TTTGAGTTCATTGTAGATTC
chr4	60776773	TTTGAGTTCATTGTAGATTC
chrY	14545652	TTTGAGTTCATTGTAGATTC
chr3	41736563	TTTGAGTTCATTGTAGATTC
chr2	134651415	TTTGAGTTCATTGTAGATTC
chr4	60269898	TTTGAGTTCATTGTAGATTC
chr1	49876028	TTTGAGTTCATTGTAGATTC
chr19	46038761	TTTGAGTTCATTGTAGATTC
chr15	71907815	TTTGAGTTCATTGTAGATTC
chr4	115336960	TTTGAGTTCATTGTAGATTC
chr5	122510486	TTTGAGTTCATTGTAGATTC
chr9	80292222	TTTGAGTTCATTGTAGATTC
chr11	25635861	TTTGAGTTCATTGTAGATTC
chr10	98803192	TTTGAGTTCATTGTAGATTC
chr11	55526873	TTTGAGTTCATTGTAGATTC
chr8	47298325	TTTGAGTTCATTGTAGATTC
chr8	63775052	TTTGAGTTCATTGTAGATTC
chrX	36548502	TTTGAGTTCATTGTAGATTC
chr3	117335953	TTTGAGTTCATTGTAGATTC
chr5	82503458	TTTGAGTTCATTGTAGATTC
chr2	59087619	TTTGAGTTCATTGTAGATTC
chr3	142393196	TTTGAGTTCATTGTAGATTC
chrX	65158643	TTTGAGTTCATTGTAGATTC
chrX	137112263	TTTGAGTTCATTGTAGATTC
chr22	50751014	TTTGAGTTCATTGTAGATTC
chr2	18012889	TTTGAGTTCATTGTAGATTC
chrX	82492072	TTTGAGTTCATTGTAGATTC
chr4	114403431	TTTGAGTTCATTGTAGATTC
chr8	84728345	TTTGAGTTCATTGTAGATTC
chr18	49103283	TTTGAGTTCATTGTAGATTC
chr4	72231739	TTTGAGTTCATTGTAGATTC
chr14	45669285	TTTGAGTTCATTGTAGATTC
chr6	77873475	TTTGAGTTCATTGTAGATTC
chr20	29467017	TTTGAGTTCATTGTAGATTC
chr8	46349481	TTTGAGTTCATTGTAGATTC
chr5	75250855	TTTGAGTTCATTGTAGATTC
chr11	22647794	TTTGAGTTCATTGTAGATTC
chr11	31316526	TTTGAGTTCATTGTAGATTC
chr12	34630399	TTTGAGTTCATTGTAGATTC
chr12	102308648	TTTGAGTTCATTGTAGATTC
chr10	133504345	TTTGAGTTCATTGTAGATTC
chr13	68416434	TTTGAGTTCATTGTAGATTC
chr11	24991939	TTTGAGTTCATTGTAGATTC
chr12	30521029	TTTGAGTTCATTGTAGATTC
chrX	30323068	TTTGAGTTCATTGTAGATTC
chr3	90383319	TTTGAGTTCATTGTAGATTC
chr7	36553854	TTTGAGTTCATTGTAGATTC
chr16	47808839	TTTGAGTTCATTGTAGATTC
chr7	37164208	TTTGAGTTCATTGTAGATTC
chr5	4497217	TTTGAGTTCATTGTAGATTC
chr11	88458724	TTTGAGTTCATTGTAGATTC
chr5	147184071	TTTGAGTTCATTGTAGATTC
chr3	151497046	TTTGAGTTCATTGTAGATTC
chrX	56879611	TTTGAGTTCATTGTAGATTC
chr3	131057759	TTTGAGTTCATTGTAGATTC
chrX	102289292	TTTGAGTTCATTGTAGATTC
chr4	95029987	TTTGAGTTCATTGTAGATTC
chr8	3250934	TTTGAGTTCATTGTAGATTC
chrX	113142582	TTTGAGTTCATTGTAGATTC
chr11	63272194	TTTGAGTTCATTGTAGATTC
chr16	36261013	TTTGAGTTCATTGTAGATTC
chr5	75809695	TTTGAGTTCATTGTAGATTC
chr5	110236991	TTTGAGTTCATTGTAGATTC
chr12	12410097	TTTGAGTTCATTGTAGATTC
chr2	173730359	TTTGAGTTCATTGTAGATTC
chr3	102968586	TTTGAGTTCATTGTAGATTC
chr2	225267097	TTTGAGTTCATTGTAGATTC
chrY	25256161	TTTGAGTTCATTGTAGATTC
chr5	85359583	TTTGAGTTCATTGTAGATTC
chr18	5333344	TTTGAGTTCATTGTAGATTC
KI270733.1	81898	TTTGAGTTCATTGTAGATTC
KI270727.1	316326	TTTGAGTTCATTGTAGATTC
chrX	56157761	TTTGAGTTCATTGTAGATTC
chr4	90676599	TTTGAGTTCATTGTAGATTC
chr2	43661341	TTTGAGTTCATTGTAGATTC
chr11	58305017	TTTGAGTTCATTGTAGATTC
chr3	138647738	TTTGAGTTCATTGTAGATTC
chr4	96410067	TTTGAGTTCATTGTAGATTC
chr16	79696351	TTTGAGTTCATTGTAGATTC
chr7	104119980	TTTGAGTTCATTGTAGATTC
chrX	133109288	TTTGAGTTCATTGTAGATTC
chr5	145336144	TTTGAGTTCATTGTAGATTC
chr5	145297063	TTTGAGTTCATTGTAGATTC
chr6	74364969	TTTGAGTTCATTGTAGATTC
chr12	34067692	TTTGAGTTCATTGTAGATTC
chr10	36008984	TTTGAGTTCATTGTAGATTC
chr9	36238612	TTTGAGTTCATTGTAGATTC
chrY	14095149	TTTGAGTTCATTGTAGATTC
chrX	20703876	TTTGAGTTCATTGTAGATTC
chr2	153907117	TTTGAGTTCATTGTAGATTC
chr6	75683274	TTTGAGTTCATTGTAGATTC
chr7	125838267	TTTGAGTTCATTGTAGATTC
chr5	100283907	TTTGAGTTCATTGTAGATTC
chr1	174610926	TTTGAGTTCATTGTAGATTC
chr4	93639180	TTTGAGTTCATTGTAGATTC
chr12	11479453	TTTGAGTTCATTGTAGATTC
chrX	21264078	TTTGAGTTCATTGTAGATTC
chr14	18293698	TTTGAGTTCATTGTAGATTC
chr12	126969516	TTTGAGTTCATTGTAGATTC
chr2	84506439	TTTGAGTTCATTGTAGATTC
chr5	69881113	TTTGAGTTCATTGTAGATTC
chr11	21101710	TTTGAGTTCATTGTAGATTC
chr4	170264150	TTTGAGTTCATTGTAGATTC
chr5	60315357	TTTGAGTTCATTGTAGATTC
chr4	57556610	TTTGAGTTCATTGTAGATTC
chrX	107489708	TTTGAGTTCATTGTAGATTC
chr2	183403182	TTTGAGTTCATTGTAGATTC
chr2	171642149	TTTGAGTTCATTGTAGATTC
chr4	32653675	TTTGAGTTCATTGTAGATTC
KI270719.1	131103	TTTGAGTTCATTGTAGATTC
chr11	5216878	TTTGAGTTCATTGTAGATTC
chr9	103466603	TTTGAGTTCATTGTAGATTC
chr9	1338904	TTTGAGTTCATTGTAGATTC
chr6	76197466	TTTGAGTTCATTGTAGATTC
chr13	93541894	TTTGAGTTCATTGTAGATTC
chr4	116808862	TTTGAGTTCATTGTAGATTC
chr8	55651037	TTTGAGTTCATTGTAGATTC
chr4	63948945	TTTGAGTTCATTGTAGATTC
chrY	23730491	TTTGAGTTCATTGTAGATTC
chr1	106240217	TTTGAGTTCATTGTAGATTC
chr11	40965239	TTTGAGTTCATTGTAGATTC
chr7	23398780	TTTGAGTTCATTGTAGATTC
chrX	86075068	TTTGAGTTCATTGTAGATTC
chr4	52219092	TTTGAGTTCATTGTAGATTC
chr7	132663014	TTTGAGTTCATTGTAGATTC
chr6	124840378	TTTGAGTTCATTGTAGATTC
chrX	64523694	TTTGAGTTCATTGTAGATTC
chr12	80245032	TTTGAGTTCATTGTAGATTC
chr11	12335324	TTTGAGTTCATTGTAGATTC
chrX	51428320	TTTGAGTTCATTGTAGATTC
chr5	54182019	TTTGAGTTCATTGTAGATTC
chr5	109013953	TTTGAGTTCATTGTAGATTC
chr2	56893712	TTTGAGTTCATTGTAGATTC
chr5	71605449	TTTGAGTTCATTGTAGATTC
chr13	42163733	TTTGAGTTCATTGTAGATTC
chrX	130448377	TTTGAGTTCATTGTAGATTC
chr7	118724923	TTTGAGTTCATTGTAGATTC
chr11	54570817	TTTGAGTTCATTGTAGATTC
chr9	103593308	TTTGAGTTCATTGTAGATTC
chrX	57123874	TTTGAGTTCATTGTAGATTC
chr4	11369700	TTTGAGTTCATTGTAGATTC
chr8	137559449	TTTGAGTTCATTGTAGATTC
chr13	45664931	TTTGAGTTCATTGTAGATTC
chr5	104358527	TTTGAGTTCATTGTAGATTC
chr14	71843836	TTTGAGTTCATTGTAGATTC
chrX	29982604	TTTGAGTTCATTGTAGATTC
chr20	9356164	TTTGAGTTCATTGTAGATTC
chr16	79377398	TTTGAGTTCATTGTAGATTC
chr3	18000565	TTTGAGTTCATTGTAGATTC
chr2	210974947	TTTGAGTTCATTGTAGATTC
chrX	111589570	TTTGAGTTCATTGTAGATTC
chr4	60105539	TTTGAGTTCATTGTAGATTC
chr10	94755747	TTTGAGTTCATTGTAGATTC
chr3	158816521	TTTGAGTTCATTGTAGATTC
chr8	13648054	TTTGAGTTCATTGTAGATTC
chrX	104809599	TTTGAGTTCATTGTAGATTC
chrX	86290293	TTTGAGTTCATTGTAGATTC
chr8	25721389	TTTGAGTTCATTGTAGATTC
chr6	109752710	TTTGAGTTCATTGTAGATTC
chr19	30142027	TTTGAGTTCATTGTAGATTC
chr3	104528858	TTTGAGTTCATTGTAGATTC
chr3	20219972	TTTGAGTTCATTGTAGATTC
chr12	60856652	TTTGAGTTCATTGTAGATTC
chr5	63615345	TTTGAGTTCATTGTAGATTC
chr19	24198648	TTTGAGTTCATTGTAGATTC
chr8	15986796	TTTGAGTTCATTGTAGATTC
chr12	48320916	TTTGAGTTCATTGTAGATTC
chr4	119886956	TTTGAGTTCATTGTAGATTC
chrX	64058374	TTTGAGTTCATTGTAGATTC
chrX	78854842	TTTGAGTTCATTGTAGATTC
chr11	124245886	TTTGAGTTCATTGTAGATTC
chr1	83351281	TTTGAGTTCATTGTAGATTC
chr6	8771368	TTTGAGTTCATTGTAGATTC
chr13	90529914	TTTGAGTTCATTGTAGATTC
chr10	130314925	TTTGAGTTCATTGTAGATTC
chr4	128647298	TTTGAGTTCATTGTAGATTC
chrX	101503657	TTTGAGTTCATTGTAGATTC
chr6	69556821	TTTGAGTTCATTGTAGATTC
chr1	178988469	TTTGAGTTCATTGTAGATTC
chr3	161002709	TTTGAGTTCATTGTAGATTC
chr15	55987343	TTTGAGTTCATTGTAGATTC
chr9	28482495	TTTGAGTTCATTGTAGATTC
chr1	247809756	TTTGAGTTCATTGTAGATTC
chr9	24575409	TTTGAGTTCATTGTAGATTC
chr3	35032916	TTTGAGTTCATTGTAGATTC
chr1	111058482	TTTGAGTTCATTGTAGATTC
chr10	61056070	TTTGAGTTCATTGTAGATTC
chr13	88444974	TTTGAGTTCATTGTAGATTC
chr4	26650584	TTTGAGTTCATTGTAGATTC
chr18	40188512	TTTGAGTTCATTGTAGATTC
chr9	110378469	TTTGAGTTCATTGTAGATTC
chr4	48918743	TTTGAGTTCATTGTAGATTC
chr2	117910982	TTTGAGTTCATTGTAGATTC
chr10	41798772	TTTGAGTTCATTGTAGATTC
chr12	3500069	TTTGAGTTCATTGTAGATTC
chr5	128820901	TTTGAGTTCATTGTAGATTC
chr12	87295023	TTTGAGTTCATTGTAGATTC
chr6	50224174	TTTGAGTTCATTGTAGATTC
chr9	15945751	TTTGAGTTCATTGTAGATTC
chr19	54581073	TTTGAGTTCATTGTAGATTC
chr1	94752225	TTTGAGTTCATTGTAGATTC
chr6	83628733	TTTGAGTTCATTGTAGATTC
[truncated: 194,257 more rows]

## Sheet: Table S4
Table S4 The top 30 longest primate L1 elements
Chr	start	end	L1 elements	Length
chr3	189017229	189025537	L1PA3	8308
chr5	42076319	42084307	L1PA3	7988
chr2	188389622	188397236	L1PB3	7614
chr18	49215768	49223192	L1PA3	7424
chr13	95733699	95740837	L1PA2	7138
chr1	174645250	174652319	L1PA7	7069
chr8	15678657	15685481	L1PA17	6824
chr1	162099628	162106422	L1PA4	6794
chrX	85058879	85065603	L1PA4	6724
chr3	135061598	135068235	L1PA4	6637
chr5	66216787	66223341	L1PA7	6554
chr1	119116363	119122915	L1PB1	6552
chr6	52428192	52434718	L1PB1	6526
chrX	74071989	74078510	L1PA8	6521
chr5	82124301	82130808	L1PA7	6507
chr4	102272655	102279158	L1PA7	6503
chr5	93522544	93529042	L1PA8	6498
chr1	173758360	173764856	L1PB1	6496
chr6	106262563	106269055	L1PA8	6492
chr2	232031501	232037991	L1PA7	6490
chr5	37650964	37657453	L1PA7	6489
chr9	83513668	83520154	L1PA7	6486
chr1	100199602	100206088	L1PA7	6486
chr16	72543204	72549689	L1PA7	6485
chr7	133964323	133970808	L1PA7	6485
chr8	75202314	75208798	L1PA8	6484
chr6	88827094	88833578	L1PA7	6484
chr9	110229429	110235911	L1PA4	6482
chr4	42041757	42048239	L1PA7	6482
chr2	198017928	198024409	L1PA7	6481
